# Supplementary material for: From Cyclo[18]carbon to the Novel Nanostructures—Theoretical Predictions
Source: MDPI journal article supplement (doi:10.3390/ijms232112960), 2022-10-26
Supplement: s1 [file s1]

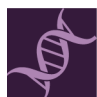

## Supplementary Information

# From Cyclo[18]carbon to the Novel Nanostructures. Theoretical Predictions.

Agnieszka Brzyska\*, Tomasz Panczyk<sup>1\*</sup>  
and Krzysztof Wolinski<sup>†</sup>

\*Jerzy Haber Institute of Catalysis and Surface Chemistry, Polish Academy of Sciences, Niezapominajek 8, 30-239 Krakow, Poland ; <sup>1</sup>Corresponding author:

tpanczyk95@gmail.com

<sup>†</sup>Department of Theoretical Chemistry, Institute of Chemical Sciences, Faculty of Chemistry, Maria Curie Skłodowska University in Lublin, pl. Maria Curie-Skłodowska 3, 20-031 Lublin, Poland

**Table S1.** The energy and the lowest vibrational frequency values obtained at the DFT/B3LYP/6-31g-dp level for the isomers of C<sub>18</sub>, C<sub>36</sub> and C<sub>72</sub>.

| Structure                              | E[au]         | $\nu_{\min}$ [cm <sup>-1</sup> ] | Symmetry         |
|----------------------------------------|---------------|----------------------------------|------------------|
| <sup>S0</sup> C <sub>18</sub>          | -685.358037   | 60.8                             | D <sub>18h</sub> |
| <sup>S0</sup> C <sub>18</sub> (TS)     | -685.226415   | -454.5                           | C <sub>2v</sub>  |
| <sup>S0</sup> C <sub>36</sub>          | -1370.7748909 | 19.7                             | C <sub>2h</sub>  |
| <sup>S0</sup> C <sub>72</sub> -ribbon  | -2741.592654  | 12.8                             | C <sub>1</sub>   |
| <sup>S0</sup> C <sub>72</sub> -sheet   | -2741.656951  | 14.2                             | C <sub>2h</sub>  |
| <sup>S1</sup> C <sub>18</sub>          | -685.2475122  | 54.16                            | C <sub>2v</sub>  |
| <sup>S1</sup> C <sub>36</sub> -ribbon  | -1370.6688861 | 22.4                             | C <sub>2v</sub>  |
| <sup>S1</sup> C <sub>36</sub> -sheet   | -1370.6890768 | 25.4                             | D <sub>2h</sub>  |
| <sup>S1</sup> C <sub>72</sub> -sheet-1 | -2741.602896  | 14.9                             | D <sub>2h</sub>  |
| <sup>S1</sup> C <sub>72</sub> -sheet-2 | -2741.545390  | 15.3                             | C <sub>2v</sub>  |
| <sup>S1</sup> C <sub>72</sub> -tube-1  | -2741.611567  | 39.6                             | C <sub>2v</sub>  |
| <sup>S1</sup> C <sub>72</sub> -tube-2  | -2741.636157  | 36.4                             | C <sub>2h</sub>  |
| <sup>S2</sup> C <sub>18</sub>          | -685.128517   | 37.7                             | C <sub>2v</sub>  |

|                          |              |        |          |
|--------------------------|--------------|--------|----------|
| $S^2C_{18}(TS1)$         | -685.198184  | -190.3 | $C_2$    |
| $S^2C_{18-int}$          | -685.200911  | 46.4   | $C_2$    |
| $S^2C_{18}(TS2)$         | -685.126754  | -519.1 | $C_{2v}$ |
| $S^2C_{36-ribbon-1}$     | -1370.546734 | 17.25  | $C_{2v}$ |
| $S^2C_{36-ribbon-1}(TS)$ | -1370.518246 | -317.9 | $C_{2v}$ |
| $S^2C_{36-ribbon-2}$     | -1370.529725 | 13.0   | $C_{2v}$ |
| $S^2C_{72-ribbon}$       | -2741.207540 | 13.6   | $D_{2h}$ |
| $S^2C_{36-sheet}$        | -1370.596843 | 47.4   | $C_1$    |
| $S^2C_{72-sheet-1}$      | -2741.190539 | 25.7   | $D_{2h}$ |
| $S^2C_{72-sheet-2}$      | -2741.420583 | 10.6   | $C_1$    |
| $S^2C_{72-tube}$         | -2741.375611 | 38.4   | $C_{2v}$ |

**Table S2.** The Cartesian coordinates (X,Y,Z) for the generated structures (C18, C36 and C72).

|    |             |           |           |          |                                                                                      |
|----|-------------|-----------|-----------|----------|--------------------------------------------------------------------------------------|
| 1. | $S^0C_{18}$ |           |           |          | 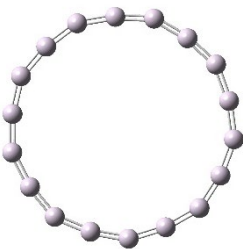 |
|    | 1 c         | 0.224210  | -3.728802 | 0.000000 |                                                                                      |
|    | 2 c         | -1.040533 | -3.497843 | 0.000000 |                                                                                      |
|    | 3 c         | 1.451361  | -3.348215 | 0.000000 |                                                                                      |
|    | 4 c         | -2.225058 | -3.000328 | 0.000000 |                                                                                      |
|    | 5 c         | 2.568959  | -2.712636 | 0.000000 |                                                                                      |
|    | 6 c         | -3.045804 | -2.010777 | 0.000000 |                                                                                      |
|    | 7 c         | 3.263843  | -1.631967 | 0.000000 |                                                                                      |
|    | 8 c         | -3.633496 | -0.868241 | 0.000000 |                                                                                      |
|    | 9 c         | 3.711738  | -0.426827 | 0.000000 |                                                                                      |
|    | 10 c        | -3.625910 | 0.417344  | 0.000000 |                                                                                      |
|    | 11 c        | 3.549136  | 0.847715  | 0.000000 |                                                                                      |
|    | 12 c        | -3.341465 | 1.670300  | 0.000000 |                                                                                      |
|    | 13 c        | 3.117713  | 2.058810  | 0.000000 |                                                                                      |
|    | 14 c        | -2.509121 | 2.650066  | 0.000000 |                                                                                      |
|    | 15 c        | 2.174016  | 2.930783  | 0.000000 |                                                                                      |
|    | 16 c        | -1.485931 | 3.427210  | 0.000000 |                                                                                      |
|    | 17 c        | 1.064866  | 3.580815  | 0.000000 |                                                                                      |
|    | 18 c        | -0.218524 | 3.642595  | 0.000000 |                                                                                      |
| 2. | $S^0C_{36}$ |           |           |          |  |
|    | 1 c         | -5.091829 | -3.326623 | 0.000000 |                                                                                      |
|    | 2 c         | -6.405348 | -3.354966 | 0.000000 |                                                                                      |
|    | 3 c         | -3.865552 | -3.053551 | 0.000000 |                                                                                      |
|    | 4 c         | -7.554743 | -2.839837 | 0.000000 |                                                                                      |
|    | 5 c         | -2.716232 | -2.411617 | 0.000000 |                                                                                      |
|    | 6 c         | -8.569416 | -2.006459 | 0.000000 |                                                                                      |
|    | 7 c         | -1.690713 | -1.695883 | 0.000000 |                                                                                      |
|    | 8 c         | -9.011327 | -0.824660 | 0.000000 |                                                                                      |

|    |                          |           |           |          |  |
|----|--------------------------|-----------|-----------|----------|--|
|    | 9 c                      | -0.737340 | -0.739401 | 0.000000 |  |
|    | 10 c                     | -9.107449 | 0.483486  | 0.000000 |  |
|    | 11 c                     | -0.766816 | 0.704686  | 0.000000 |  |
|    | 12 c                     | -8.557438 | 1.619659  | 0.000000 |  |
|    | 13 c                     | -1.767978 | 1.608555  | 0.000000 |  |
|    | 14 c                     | -7.679879 | 2.592895  | 0.000000 |  |
|    | 15 c                     | -2.785022 | 2.337439  | 0.000000 |  |
|    | 16 c                     | -6.501596 | 3.041925  | 0.000000 |  |
|    | 17 c                     | -3.982249 | 2.877798  | 0.000000 |  |
|    | 18 c                     | -5.200108 | 3.193023  | 0.000000 |  |
|    | 19 c                     | 5.200108  | -3.193023 | 0.000000 |  |
|    | 20 c                     | 3.982249  | -2.877798 | 0.000000 |  |
|    | 21 c                     | 6.501596  | -3.041925 | 0.000000 |  |
|    | 22 c                     | 2.785022  | -2.337439 | 0.000000 |  |
|    | 23 c                     | 7.679879  | -2.592895 | 0.000000 |  |
|    | 24 c                     | 1.767978  | -1.608555 | 0.000000 |  |
|    | 25 c                     | 8.557438  | -1.619659 | 0.000000 |  |
|    | 26 c                     | 0.766816  | -0.704686 | 0.000000 |  |
|    | 27 c                     | 9.107449  | -0.483486 | 0.000000 |  |
|    | 28 c                     | 0.737340  | 0.739401  | 0.000000 |  |
|    | 29 c                     | 9.011327  | 0.824660  | 0.000000 |  |
|    | 30 c                     | 1.690713  | 1.695883  | 0.000000 |  |
|    | 31 c                     | 8.569416  | 2.006459  | 0.000000 |  |
|    | 32 c                     | 2.716232  | 2.411617  | 0.000000 |  |
|    | 33 c                     | 7.554743  | 2.839837  | 0.000000 |  |
|    | 34 c                     | 3.865552  | 3.053551  | 0.000000 |  |
|    | 35 c                     | 6.405348  | 3.354966  | 0.000000 |  |
|    | 36 c                     | 5.091829  | 3.326623  | 0.000000 |  |
| 3. | <sup>50</sup> C72-ribbon |           |           |          |  |

|          |            |           |           |
|----------|------------|-----------|-----------|
| 1 c      | -15.919655 | -3.855167 | 0.304360  |
| 2 c      | -17.235360 | -3.920404 | 0.219376  |
| 3 c      | -14.703013 | -3.570354 | 0.368167  |
| 4 c      | -18.404526 | -3.478343 | 0.113315  |
| 5 c      | -13.535052 | -2.949641 | 0.384146  |
| 6 c      | -19.469424 | -2.708414 | -0.007941 |
| 7 c      | -12.493314 | -2.266152 | 0.362120  |
| 8 c      | -19.971963 | -1.561636 | -0.117811 |
| 9 c      | -11.537506 | -1.304951 | 0.245334  |
| 10 c     | -20.104782 | -0.253039 | -         |
| 0.209895 |            |           |           |
| 11 c     | -11.607322 | 0.133057  | 0.164650  |
| 12 c     | -19.558346 | 0.879318  | -         |
| 0.242591 |            |           |           |
| 13 c     | -12.656030 | 0.997746  | 0.157569  |
| 14 c     | -18.655819 | 1.838132  | -         |
| 0.243861 |            |           |           |
| 15 c     | -13.724526 | 1.636054  | 0.095952  |
| 16 c     | -17.472404 | 2.256271  | -         |
| 0.190939 |            |           |           |
| 17 c     | -14.949454 | 2.118525  | -         |
| 0.005778 |            |           |           |
| 18 c     | -16.166061 | 2.397996  | -         |
| 0.108813 |            |           |           |
| 19 c     | -5.264403  | -2.710935 | 0.512658  |
| 20 c     | -6.547426  | -2.721727 | 0.394982  |
| 21 c     | -4.000560  | -2.580138 | 0.603802  |
| 22 c     | -7.795264  | -2.445024 | 0.266590  |
| 23 c     | -2.766844  | -2.171438 | 0.622831  |
| 24 c     | -9.018703  | -2.093040 | 0.159072  |
| 25 c     | -1.596723  | -1.694670 | 0.582483  |
| 26 c     | -10.061557 | -1.278790 |           |
| 0.081462 |            |           |           |
| 27 c     | -0.633092  | -0.773564 | 0.414443  |
| 28 c     | -10.135328 | 0.236035  | 0.000021  |
| 29 c     | -0.711637  | 0.707725  | 0.386566  |
| 30 c     | -9.182291  | 1.156967  | -0.005600 |
| 31 c     | -1.769677  | 1.529646  | 0.496134  |
| 32 c     | -8.001047  | 1.639127  | 0.072710  |
| 33 c     | -2.979130  | 1.895717  | 0.482499  |
| 34 c     | -6.790354  | 2.054866  | 0.177531  |
| 35 c     | -4.245221  | 2.184366  | 0.415141  |
| 36 c     | -5.513871  | 2.181100  | 0.302106  |
| 37 c     | 5.546579   | -2.236290 | 0.050679  |
| 38 c     | 4.275169   | -2.221977 | -0.087250 |
| 39 c     | 6.818843   | -2.127520 | 0.196996  |
| 40 c     | 3.018416   | -1.917748 | -0.167342 |
| 41 c     | 8.035424   | -1.715660 | 0.309816  |
| 42 c     | 1.808688   | -1.536963 | -0.185761 |
| 43 c     | 9.209228   | -1.224210 | 0.376262  |
| 44 c     | 0.759403   | -0.713910 | -0.082912 |

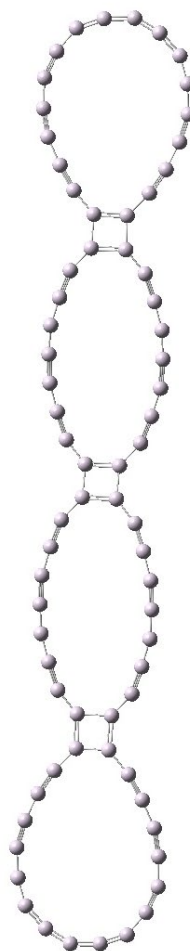

|    |                                      |           |           |           |                                                                                      |
|----|--------------------------------------|-----------|-----------|-----------|--------------------------------------------------------------------------------------|
|    | 45 c                                 | 10.166374 | -0.301891 | 0.371155  |                                                                                      |
|    | 46 c                                 | 0.683218  | 0.777582  | -0.097436 |                                                                                      |
|    | 47 c                                 | 10.089221 | 1.200799  | 0.430860  |                                                                                      |
|    | 48 c                                 | 1.649446  | 1.699353  | -0.187595 |                                                                                      |
|    | 49 c                                 | 9.042028  | 2.017188  | 0.492482  |                                                                                      |
|    | 50 c                                 | 2.820806  | 2.182865  | -0.133051 |                                                                                      |
|    | 51 c                                 | 7.828970  | 2.400673  | 0.432831  |                                                                                      |
|    | 52 c                                 | 4.044987  | 2.590953  | -0.016654 |                                                                                      |
|    | 53 c                                 | 6.581261  | 2.703689  | 0.315808  |                                                                                      |
|    | 54 c                                 | 5.307463  | 2.708376  | 0.147732  |                                                                                      |
|    | 55 c                                 | 16.150210 | -2.348167 | -         |                                                                                      |
|    | 0.760010                             |           |           |           |                                                                                      |
|    | 56 c                                 | 14.931971 | -2.090580 | -         |                                                                                      |
|    | 0.622251                             |           |           |           |                                                                                      |
|    | 57 c                                 | 17.452043 | -2.188273 | -         |                                                                                      |
|    | 0.878776                             |           |           |           |                                                                                      |
|    | 58 c                                 | 13.704671 | -1.632558 | -         |                                                                                      |
|    | 0.456982                             |           |           |           |                                                                                      |
|    | 59 c                                 | 18.628199 | -1.756440 | -         |                                                                                      |
|    | 0.967451                             |           |           |           |                                                                                      |
|    | 60 c                                 | 12.634129 | -1.023837 | -         |                                                                                      |
|    | 0.262685                             |           |           |           |                                                                                      |
|    | 61 c                                 | 19.523664 | -0.790510 | -         |                                                                                      |
|    | 0.989416                             |           |           |           |                                                                                      |
|    | 62 c                                 | 11.601319 | -0.179364 | -         |                                                                                      |
|    | 0.000236                             |           |           |           |                                                                                      |
|    | 63 c                                 | 20.064420 | 0.344935  | -0.959678 |                                                                                      |
|    | 64 c                                 | 11.528661 | 1.260492  | 0.066209  |                                                                                      |
|    | 65 c                                 | 19.924506 | 1.652880  | -0.860096 |                                                                                      |
|    | 66 c                                 | 12.460704 | 2.238523  | -0.094875 |                                                                                      |
|    | 67 c                                 | 19.411390 | 2.794826  | -0.743680 |                                                                                      |
|    | 68 c                                 | 13.484733 | 2.941614  | -0.189704 |                                                                                      |
|    | 69 c                                 | 18.337399 | 3.549267  | -0.600545 |                                                                                      |
|    | 70 c                                 | 14.639983 | 3.581278  | -0.271993 |                                                                                      |
|    | 71 c                                 | 17.163449 | 3.970930  | -0.468742 |                                                                                      |
|    | 72 c                                 | 15.850709 | 3.884455  | -0.358501 |                                                                                      |
| 4. | <sup>50</sup> C <sub>72</sub> -sheet |           |           |           |                                                                                      |
|    | 1 c                                  | -5.232917 | 0.612095  | 0.000000  | 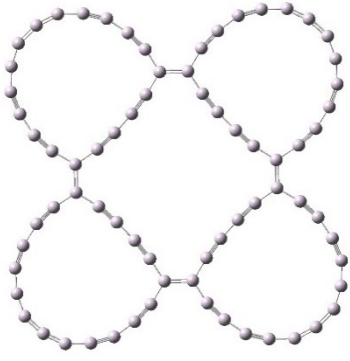 |
|    | 2 c                                  | -6.435784 | 1.308533  | 0.000000  |                                                                                      |
|    | 3 c                                  | -4.097201 | 1.400438  | 0.000000  |                                                                                      |
|    | 4 c                                  | -7.362765 | 2.130840  | 0.000000  |                                                                                      |
|    | 5 c                                  | -3.196202 | 2.254206  | 0.000000  |                                                                                      |
|    | 6 c                                  | -8.109262 | 3.228025  | 0.000000  |                                                                                      |
|    | 7 c                                  | -2.309285 | 3.244402  | 0.000000  |                                                                                      |
|    | 8 c                                  | -8.577069 | 4.385188  | 0.000000  |                                                                                      |
|    | 9 c                                  | -1.565460 | 4.238015  | 0.000000  |                                                                                      |
|    | 10 c                                 | -8.554127 | 5.708210  | 0.000000  |                                                                                      |
|    | 11 c                                 | -0.855757 | 5.423735  | 0.000000  |                                                                                      |
|    | 12 c                                 | -8.186921 | 6.904217  | 0.000000  |                                                                                      |
|    | 13 c                                 | -1.607299 | 6.594062  | 0.000000  |                                                                                      |
|    | 14 c                                 | -7.253435 | 7.842923  | 0.000000  |                                                                                      |

|    |   |           |           |          |
|----|---|-----------|-----------|----------|
| 15 | c | -2.501606 | 7.450813  | 0.000000 |
| 16 | c | -6.149012 | 8.429887  | 0.000000 |
| 17 | c | -3.606073 | 8.193381  | 0.000000 |
| 18 | c | -4.824294 | 8.461113  | 0.000000 |
| 19 | c | 5.193423  | 0.848751  | 0.000000 |
| 20 | c | 4.016606  | 1.573073  | 0.000000 |
| 21 | c | 6.357020  | 1.609831  | 0.000000 |
| 22 | c | 3.081195  | 2.388673  | 0.000000 |
| 23 | c | 7.242546  | 2.477044  | 0.000000 |
| 24 | c | 2.151914  | 3.338240  | 0.000000 |
| 25 | c | 7.941742  | 3.604961  | 0.000000 |
| 26 | c | 1.363655  | 4.296633  | 0.000000 |
| 27 | c | 8.356831  | 4.782291  | 0.000000 |
| 28 | c | 0.607004  | 5.453137  | 0.000000 |
| 29 | c | 8.267669  | 6.101941  | 0.000000 |
| 30 | c | 1.306772  | 6.654832  | 0.000000 |
| 31 | c | 7.857589  | 7.283649  | 0.000000 |
| 32 | c | 2.155189  | 7.556685  | 0.000000 |
| 33 | c | 6.884119  | 8.180245  | 0.000000 |
| 34 | c | 3.224094  | 8.349408  | 0.000000 |
| 35 | c | 5.751565  | 8.709899  | 0.000000 |
| 36 | c | 4.427404  | 8.676318  | 0.000000 |
| 37 | c | -4.427404 | -8.676318 | 0.000000 |
| 38 | c | -5.751565 | -8.709899 | 0.000000 |
| 39 | c | -3.224094 | -8.349408 | 0.000000 |
| 40 | c | -6.884119 | -8.180245 | 0.000000 |
| 41 | c | -2.155189 | -7.556685 | 0.000000 |
| 42 | c | -7.857589 | -7.283649 | 0.000000 |
| 43 | c | -1.306772 | -6.654832 | 0.000000 |
| 44 | c | -8.267669 | -6.101941 | 0.000000 |
| 45 | c | -0.607004 | -5.453137 | 0.000000 |
| 46 | c | -8.356831 | -4.782291 | 0.000000 |
| 47 | c | -1.363655 | -4.296633 | 0.000000 |
| 48 | c | -7.941742 | -3.604961 | 0.000000 |
| 49 | c | -2.151914 | -3.338240 | 0.000000 |
| 50 | c | -7.242546 | -2.477044 | 0.000000 |
| 51 | c | -3.081195 | -2.388673 | 0.000000 |
| 52 | c | -6.357020 | -1.609831 | 0.000000 |
| 53 | c | -4.016606 | -1.573073 | 0.000000 |
| 54 | c | -5.193423 | -0.848751 | 0.000000 |
| 55 | c | 4.824294  | -8.461113 | 0.000000 |
| 56 | c | 3.606073  | -8.193381 | 0.000000 |
| 57 | c | 6.149012  | -8.429887 | 0.000000 |
| 58 | c | 2.501606  | -7.450813 | 0.000000 |
| 59 | c | 7.253435  | -7.842923 | 0.000000 |
| 60 | c | 1.607299  | -6.594062 | 0.000000 |
| 61 | c | 8.186921  | -6.904217 | 0.000000 |
| 62 | c | 0.855757  | -5.423735 | 0.000000 |
| 63 | c | 8.554127  | -5.708210 | 0.000000 |
| 64 | c | 1.565460  | -4.238015 | 0.000000 |
| 65 | c | 8.577069  | -4.385188 | 0.000000 |

|    |                                    |           |           |           |                                                                                      |
|----|------------------------------------|-----------|-----------|-----------|--------------------------------------------------------------------------------------|
|    | 66 c                               | 2.309285  | -3.244402 | 0.000000  |                                                                                      |
|    | 67 c                               | 8.109262  | -3.228025 | 0.000000  |                                                                                      |
|    | 68 c                               | 3.196202  | -2.254206 | 0.000000  |                                                                                      |
|    | 69 c                               | 7.362765  | -2.130840 | 0.000000  |                                                                                      |
|    | 70 c                               | 4.097201  | -1.400438 | 0.000000  |                                                                                      |
|    | 71 c                               | 6.435784  | -1.308533 | 0.000000  |                                                                                      |
|    | 72 c                               | 5.232917  | -0.612095 | 0.000000  |                                                                                      |
| 5. | <sup>50</sup> C <sub>18</sub> (TS) |           |           |           |                                                                                      |
|    | 1 c                                | 0.056786  | -0.945232 | 0.000044  | 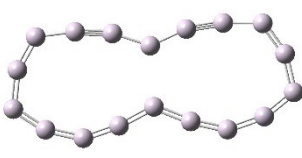   |
|    | 2 c                                | -1.114265 | -1.581247 | 0.000093  |                                                                                      |
|    | 3 c                                | 1.295098  | -1.436595 | -0.000067 |                                                                                      |
|    | 4 c                                | -2.308012 | -1.997826 | 0.000139  |                                                                                      |
|    | 5 c                                | 2.530368  | -1.707727 | -0.000158 |                                                                                      |
|    | 6 c                                | -3.582086 | -1.712738 | 0.000140  |                                                                                      |
|    | 7 c                                | 3.760698  | -1.272071 | -0.000166 |                                                                                      |
|    | 8 c                                | -4.661339 | -1.022423 | 0.000096  |                                                                                      |
|    | 9 c                                | 4.750626  | -0.458043 | -0.000111 |                                                                                      |
|    | 10 c                               | -4.526103 | 0.292977  | -         |                                                                                      |
|    | 0.000056                           |           |           |           |                                                                                      |
|    | 11 c                               | 4.458053  | 0.831132  | 0.000069  |                                                                                      |
|    | 12 c                               | -3.907436 | 1.403868  | -         |                                                                                      |
|    | 0.000178                           |           |           |           |                                                                                      |
|    | 13 c                               | 3.711576  | 1.860964  | 0.000211  |                                                                                      |
|    | 14 c                               | -2.590720 | 1.575907  | -         |                                                                                      |
|    | 0.000147                           |           |           |           |                                                                                      |
|    | 15 c                               | 2.384137  | 1.874220  | 0.000160  |                                                                                      |
|    | 16 c                               | -1.335783 | 1.517916  | -         |                                                                                      |
|    | 0.000093                           |           |           |           |                                                                                      |
|    | 17 c                               | 1.144665  | 1.667348  | 0.000073  |  |
|    | 18 c                               | -0.066263 | 1.109571  | -         |                                                                                      |
|    | 0.000050                           |           |           |           |                                                                                      |
| 6. | <sup>51</sup> C <sub>18</sub>      |           |           |           |                                                                                      |
|    | 1 c                                | 0.040397  | -0.673627 | 0.000000  |  |
|    | 2 c                                | -1.106155 | -1.456587 | 0.000000  |                                                                                      |
|    | 3 c                                | 1.272396  | -1.313737 | 0.000000  |                                                                                      |
|    | 4 c                                | -2.240352 | -1.964862 | 0.000000  |                                                                                      |
|    | 5 c                                | 2.459340  | -1.682465 | 0.000000  |                                                                                      |
|    | 6 c                                | -3.552517 | -1.737710 | 0.000000  |                                                                                      |
|    | 7 c                                | 3.734829  | -1.299822 | 0.000000  |                                                                                      |
|    | 8 c                                | -4.600823 | -1.036310 | 0.000000  |                                                                                      |
|    | 9 c                                | 4.691938  | -0.478274 | 0.000000  |                                                                                      |
|    | 10 c                               | -4.501763 | 0.304095  | 0.000000  |                                                                                      |
|    | 11 c                               | 4.432740  | 0.840556  | 0.000000  |                                                                                      |
|    | 12 c                               | -3.883510 | 1.396973  | 0.000000  |                                                                                      |
|    | 13 c                               | 3.688609  | 1.851936  | 0.000000  |                                                                                      |
|    | 14 c                               | -2.537750 | 1.564534  | 0.000000  |                                                                                      |
|    | 15 c                               | 2.332421  | 1.856763  | 0.000000  |                                                                                      |
|    | 16 c                               | -1.308217 | 1.427889  | 0.000000  |                                                                                      |
|    | 17 c                               | 1.128019  | 1.574144  | 0.000000  |                                                                                      |
|    | 18 c                               | -0.049602 | 0.826504  | 0.000000  |                                                                                      |

|    |                                       |           |           |          |                                                                                    |
|----|---------------------------------------|-----------|-----------|----------|------------------------------------------------------------------------------------|
| 7. | <sup>51</sup> C <sub>36</sub> -ribbon |           |           |          | 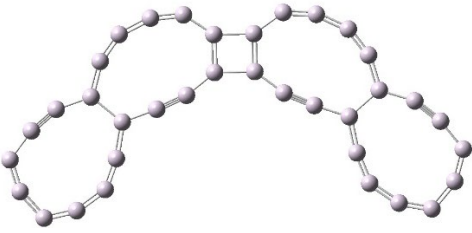 |
|    | 1 c                                   | -4.272835 | -0.461607 | 0.000000 |                                                                                    |
|    | 2 c                                   | -4.495305 | -1.836873 | 0.000000 |                                                                                    |
|    | 3 c                                   | -2.974580 | 0.019335  | 0.000000 |                                                                                    |
|    | 4 c                                   | -4.916130 | -3.004344 | 0.000000 |                                                                                    |
|    | 5 c                                   | -1.850848 | 0.542956  | 0.000000 |                                                                                    |
|    | 6 c                                   | -5.988997 | -3.797815 | 0.000000 |                                                                                    |
|    | 7 c                                   | -0.791062 | 1.401203  | 0.000000 |                                                                                    |
|    | 8 c                                   | -7.217133 | -4.078264 | 0.000000 |                                                                                    |
|    | 9 c                                   | -0.820282 | 2.829164  | 0.000000 |                                                                                    |
|    | 10 c                                  | -8.123263 | -3.082722 | 0.000000 |                                                                                    |
|    | 11 c                                  | -1.966898 | 3.572448  | 0.000000 |                                                                                    |
|    | 12 c                                  | -8.504503 | -1.887172 | 0.000000 |                                                                                    |
|    | 13 c                                  | -3.209939 | 3.444228  | 0.000000 |                                                                                    |
|    | 14 c                                  | -7.698589 | -0.793775 | 0.000000 |                                                                                    |
|    | 15 c                                  | -4.389223 | 2.833014  | 0.000000 |                                                                                    |
|    | 16 c                                  | -6.763303 | 0.015061  | 0.000000 |                                                                                    |
|    | 17 c                                  | -5.107014 | 1.819253  | 0.000000 |                                                                                    |
|    | 18 c                                  | -5.446603 | 0.479510  | 0.000000 |                                                                                    |
|    | 19 c                                  | 4.288915  | -0.261581 | 0.000000 |                                                                                    |
|    | 20 c                                  | 2.969716  | 0.158439  | 0.000000 |                                                                                    |
|    | 21 c                                  | 4.575753  | -1.624913 | 0.000000 |                                                                                    |
|    | 22 c                                  | 1.822711  | 0.628909  | 0.000000 |                                                                                    |
|    | 23 c                                  | 5.053490  | -2.770183 | 0.000000 |                                                                                    |
|    | 24 c                                  | 0.723949  | 1.436681  | 0.000000 |                                                                                    |
|    | 25 c                                  | 6.162403  | -3.512607 | 0.000000 |                                                                                    |
|    | 26 c                                  | 0.685873  | 2.864492  | 0.000000 |                                                                                    |
|    | 27 c                                  | 7.402601  | -3.732528 | 0.000000 |                                                                                    |
|    | 28 c                                  | 1.796201  | 3.660956  | 0.000000 |                                                                                    |
|    | 29 c                                  | 8.262005  | -2.696405 | 0.000000 |                                                                                    |
|    | 30 c                                  | 3.043883  | 3.590701  | 0.000000 |                                                                                    |
|    | 31 c                                  | 8.584419  | -1.483808 | 0.000000 |                                                                                    |
|    | 32 c                                  | 4.250455  | 3.035324  | 0.000000 |                                                                                    |
|    | 33 c                                  | 7.728005  | -0.429603 | 0.000000 |                                                                                    |
|    | 34 c                                  | 5.014763  | 2.056143  | 0.000000 |                                                                                    |
|    | 35 c                                  | 6.754287  | 0.332471  | 0.000000 |                                                                                    |
|    | 36 c                                  | 5.417079  | 0.733911  | 0.000000 |                                                                                    |
| 8. | <sup>51</sup> C <sub>36</sub> -sheet  |           |           |          |                                                                                    |



|      |           |           |          |
|------|-----------|-----------|----------|
| 1 c  | 0.127400  | -4.136231 | 0.000000 |
| 2 c  | -1.085366 | -4.830908 | 0.000000 |
| 3 c  | 1.381737  | -4.752502 | 0.000000 |
| 4 c  | -2.286989 | -5.114687 | 0.000000 |
| 5 c  | 2.597810  | -4.966035 | 0.000000 |
| 6 c  | -3.610097 | -4.834168 | 0.000000 |
| 7 c  | 3.900878  | -4.603181 | 0.000000 |
| 8 c  | -4.154424 | -3.709434 | 0.000000 |
| 9 c  | 4.375831  | -3.447522 | 0.000000 |
| 10 c | -3.943297 | -2.388062 | 0.000000 |
| 11 c | 4.081287  | -2.142125 | 0.000000 |
| 12 c | -3.047525 | -1.530138 | 0.000000 |
| 13 c | 3.134429  | -1.341015 | 0.000000 |
| 14 c | -1.863345 | -0.797452 | 0.000000 |
| 15 c | 1.907710  | -0.681974 | 0.000000 |
| 16 c | -0.670956 | -1.512321 | 0.000000 |
| 17 c | 0.761032  | -1.467963 | 0.000000 |
| 18 c | 0.082508  | -2.700212 | 0.000000 |
| 19 c | -0.083208 | 2.699557  | 0.000000 |
| 20 c | -0.761840 | 1.467365  | 0.000000 |
| 21 c | 0.670117  | 1.511569  | 0.000000 |
| 22 c | -1.908625 | 0.681485  | 0.000000 |
| 23 c | 1.862606  | 0.797014  | 0.000000 |
| 24 c | -3.135457 | 1.340592  | 0.000000 |
| 25 c | 3.046792  | 1.529845  | 0.000000 |
| 26 c | -4.080041 | 2.144096  | 0.000000 |
| 27 c | 3.941910  | 2.388370  | 0.000000 |
| 28 c | -4.378557 | 3.448915  | 0.000000 |
| 29 c | 4.155139  | 3.709449  | 0.000000 |
| 30 c | -3.897808 | 4.601918  | 0.000000 |
| 31 c | 3.610271  | 4.833828  | 0.000000 |
| 32 c | -2.596350 | 4.968735  | 0.000000 |
| 33 c | 2.287376  | 5.115852  | 0.000000 |
| 34 c | -1.380602 | 4.752933  | 0.000000 |
| 35 c | 1.086526  | 4.828921  | 0.000000 |
| 36 c | -0.126870 | 4.135490  | 0.000000 |

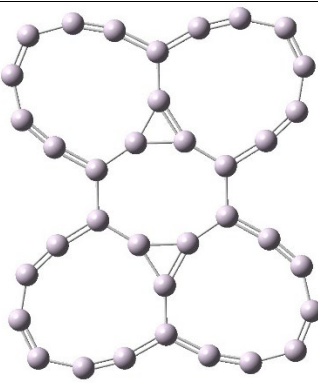

|  |          |                      |                                                                                    |
|--|----------|----------------------|------------------------------------------------------------------------------------|
|  | 1 c      | 0.202843 -10.810484  | 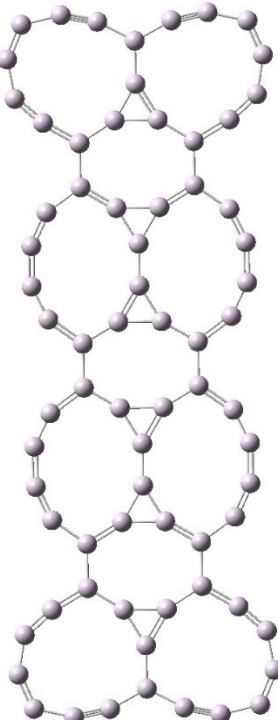 |
|  | 0.000000 |                      |                                                                                    |
|  | 2 c      | -1.016967 -11.490519 |                                                                                    |
|  | 0.000000 |                      |                                                                                    |
|  | 3 c      | 1.449661 -11.439622  |                                                                                    |
|  | 0.000000 |                      |                                                                                    |
|  | 4 c      | -2.221050 -11.764905 |                                                                                    |
|  | 0.000000 |                      |                                                                                    |
|  | 5 c      | 2.664711 -11.661204  |                                                                                    |
|  | 0.000000 |                      |                                                                                    |
|  | 6 c      | -3.546109 -11.489451 |                                                                                    |
|  | 0.000000 |                      |                                                                                    |
|  | 7 c      | 3.978041 -11.334765  |                                                                                    |
|  | 0.000000 |                      |                                                                                    |
|  | 8 c      | -4.069225 -10.353530 |                                                                                    |
|  | 0.000000 |                      |                                                                                    |
|  | 9 c      | 4.454959 -10.178473  |                                                                                    |
|  | 0.000000 |                      |                                                                                    |
|  | 10 c     | -3.861856 -9.032828  |                                                                                    |
|  | 0.000000 |                      |                                                                                    |
|  | 11 c     | 4.198087 -8.866777   |                                                                                    |
|  | 0.000000 |                      |                                                                                    |
|  | 12 c     | -2.953975 -8.186473  |                                                                                    |
|  | 0.000000 |                      |                                                                                    |
|  | 13 c     | 3.253540 -8.061359   |                                                                                    |
|  | 0.000000 |                      |                                                                                    |
|  | 14 c     | -1.767628 -7.459798  |                                                                                    |
|  | 0.000000 |                      |                                                                                    |
|  | 15 c     | 2.038304 -7.385008   |                                                                                    |
|  | 0.000000 |                      |                                                                                    |
|  | 16 c     | -0.570304 -8.178307  |                                                                                    |
|  | 0.000000 |                      |                                                                                    |
|  | 17 c     | 0.870265 -8.150356   |                                                                                    |
|  | 0.000000 |                      |                                                                                    |
|  | 18 c     | 0.173522 -9.370606   |                                                                                    |
|  | 0.000000 |                      |                                                                                    |
|  | 19 c     | 0.069436 -4.035817   |                                                                                    |
|  | 0.000000 |                      |                                                                                    |
|  | 20 c     | -0.623966 -5.255225  |                                                                                    |
|  | 0.000000 |                      |                                                                                    |
|  | 21 c     | 0.810556 -5.227139   |                                                                                    |
|  | 0.000000 |                      |                                                                                    |
|  | 22 c     | -1.789190 -5.985794  |                                                                                    |
|  | 0.000000 |                      |                                                                                    |
|  | 23 c     | 2.002701 -5.911675   |                                                                                    |
|  | 0.000000 |                      |                                                                                    |
|  | 24 c     | -2.952732 -5.193913  |                                                                                    |
|  | 0.000000 |                      |                                                                                    |
|  | 25 c     | 3.136468 -5.077314   |                                                                                    |
|  | 0.000000 |                      |                                                                                    |

|          |           |           |  |
|----------|-----------|-----------|--|
| 26 c     | -3.500166 | -4.087131 |  |
| 0.000000 |           |           |  |
| 27 c     | 3.647018  | -3.953333 |  |
| 0.000000 |           |           |  |
| 28 c     | -3.538047 | -2.741543 |  |
| 0.000000 |           |           |  |
| 29 c     | 3.633878  | -2.606724 |  |
| 0.000000 |           |           |  |
| 30 c     | -3.021385 | -1.620177 |  |
| 0.000000 |           |           |  |
| 31 c     | 3.074232  | -1.506511 |  |
| 0.000000 |           |           |  |
| 32 c     | -1.901528 | -0.770319 |  |
| 0.000000 |           |           |  |
| 33 c     | 1.921734  | -0.700571 |  |
| 0.000000 |           |           |  |
| 34 c     | -0.698234 | -1.446995 |  |
| 0.000000 |           |           |  |
| 35 c     | 0.744510  | -1.420782 |  |
| 0.000000 |           |           |  |
| 36 c     | 0.044231  | -2.636483 |  |
| 0.000000 |           |           |  |
| 37 c     | -0.052527 | 2.635802  |  |
| 0.000000 |           |           |  |
| 38 c     | -0.751116 | 1.419520  |  |
| 0.000000 |           |           |  |
| 39 c     | 0.691589  | 1.446873  |  |
| 0.000000 |           |           |  |
| 40 c     | -1.928475 | 0.699630  |  |
| 0.000000 |           |           |  |
| 41 c     | 1.894534  | 0.769409  |  |
| 0.000000 |           |           |  |
| 42 c     | -3.079194 | 1.507927  |  |
| 0.000000 |           |           |  |
| 43 c     | 3.016148  | 1.616638  |  |
| 0.000000 |           |           |  |
| 44 c     | -3.636482 | 2.609370  |  |
| 0.000000 |           |           |  |
| 45 c     | 3.533807  | 2.737458  |  |
| 0.000000 |           |           |  |
| 46 c     | -3.649159 | 3.955827  |  |
| 0.000000 |           |           |  |
| 47 c     | 3.496425  | 4.083082  |  |
| 0.000000 |           |           |  |
| 48 c     | -3.143267 | 5.081858  |  |
| 0.000000 |           |           |  |
| 49 c     | 2.945450  | 5.188000  |  |
| 0.000000 |           |           |  |
| 50 c     | -2.008996 | 5.915957  |  |
| 0.000000 |           |           |  |

|    |              |           |           |  |
|----|--------------|-----------|-----------|--|
|    | 51 c         | 1.782898  | 5.980772  |  |
|    | 0.000000     |           |           |  |
|    | 52 c         | -0.818234 | 5.228612  |  |
|    | 0.000000     |           |           |  |
|    | 53 c         | 0.616216  | 5.252833  |  |
|    | 0.000000     |           |           |  |
|    | 54 c         | -0.079591 | 4.035162  |  |
|    | 0.000000     |           |           |  |
|    | 55 c         | -0.171638 | 9.370148  |  |
|    | 0.000000     |           |           |  |
|    | 56 c         | -0.871617 | 8.151716  |  |
|    | 0.000000     |           |           |  |
|    | 57 c         | 0.568826  | 8.175792  |  |
|    | 0.000000     |           |           |  |
|    | 58 c         | -2.041858 | 7.389882  |  |
|    | 0.000000     |           |           |  |
|    | 59 c         | 1.764361  | 7.454426  |  |
|    | 0.000000     |           |           |  |
|    | 60 c         | -3.253214 | 8.073816  |  |
|    | 0.000000     |           |           |  |
|    | 61 c         | 2.953489  | 8.176014  |  |
|    | 0.000000     |           |           |  |
|    | 62 c         | -4.190663 | 8.887534  |  |
|    | 0.000000     |           |           |  |
|    | 63 c         | 3.867385  | 9.015893  |  |
|    | 0.000000     |           |           |  |
|    | 64 c         | -4.445459 | 10.199586 |  |
|    | 0.000000     |           |           |  |
|    | 65 c         | 4.078488  | 10.335864 |  |
|    | 0.000000     |           |           |  |
|    | 66 c         | -3.965312 | 11.354552 |  |
|    | 0.000000     |           |           |  |
|    | 67 c         | 3.559321  | 11.473713 |  |
|    | 0.000000     |           |           |  |
|    | 68 c         | -2.650852 | 11.676545 |  |
|    | 0.000000     |           |           |  |
|    | 69 c         | 2.234807  | 11.751938 |  |
|    | 0.000000     |           |           |  |
|    | 70 c         | -1.437537 | 11.446032 |  |
|    | 0.000000     |           |           |  |
|    | 71 c         | 1.029356  | 11.483586 |  |
|    | 0.000000     |           |           |  |
|    | 72 c         | -0.194247 | 10.810142 |  |
|    | 0.000000     |           |           |  |
| 10 | SIC72-tube-1 |           |           |  |

|          |           |           |                                                                                    |
|----------|-----------|-----------|------------------------------------------------------------------------------------|
| 1 c      | 0.028166  | -1.514165 | 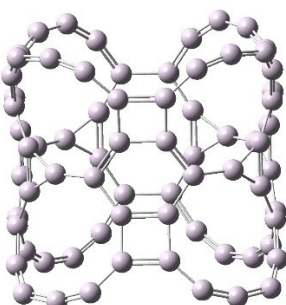 |
| 3.239612 |           |           |                                                                                    |
| 2 c      | -1.140877 | -0.732387 |                                                                                    |
| 3.539680 |           |           |                                                                                    |
| 3 c      | 1.158981  | -0.682346 |                                                                                    |
| 3.546908 |           |           |                                                                                    |
| 4 c      | -2.550080 | -0.771959 |                                                                                    |
| 3.912435 |           |           |                                                                                    |
| 5 c      | 2.568073  | -0.661318 |                                                                                    |
| 3.922871 |           |           |                                                                                    |
| 6 c      | -3.445914 | -1.787175 |                                                                                    |
| 4.034578 |           |           |                                                                                    |
| 7 c      | 3.508085  | -1.636489 |                                                                                    |
| 4.044552 |           |           |                                                                                    |
| 8 c      | -3.757360 | -2.858803 |                                                                                    |
| 3.469184 |           |           |                                                                                    |
| 9 c      | 3.868986  | -2.690628 |                                                                                    |
| 3.476140 |           |           |                                                                                    |
| 10 c     | -3.632478 | -3.887794 |                                                                                    |
| 2.641537 |           |           |                                                                                    |
| 11 c     | 3.791183  | -3.726003 |                                                                                    |
| 2.650537 |           |           |                                                                                    |
| 12 c     | -2.898166 | -4.086322 |                                                                                    |
| 1.643786 |           |           |                                                                                    |
| 13 c     | 3.067451  | -3.955978 |                                                                                    |
| 1.651780 |           |           |                                                                                    |
| 14 c     | -1.791560 | -4.026480 |                                                                                    |
| 0.843415 |           |           |                                                                                    |
| 15 c     | 1.961680  | -3.945344 |                                                                                    |
| 0.848681 |           |           |                                                                                    |
| 16 c     | -0.615503 | -3.583134 |                                                                                    |
| 1.551002 |           |           |                                                                                    |
| 17 c     | 0.764622  | -3.555062 |                                                                                    |
| 1.552450 |           |           |                                                                                    |
| 18 c     | 0.056682  | -2.733697 |                                                                                    |
| 2.459106 |           |           |                                                                                    |
| 19 c     | 0.076726  | -3.403234 | -                                                                                  |
| 2.463306 |           |           |                                                                                    |
| 20 c     | -0.628220 | -3.866114 | -                                                                                  |
| 1.334413 |           |           |                                                                                    |
| 21 c     | 0.798542  | -3.835002 | -                                                                                  |
| 1.332498 |           |           |                                                                                    |
| 22 c     | -1.801203 | -4.036239 | -                                                                                  |
| 0.609323 |           |           |                                                                                    |
| 23 c     | 1.975606  | -3.954411 | -                                                                                  |
| 0.604017 |           |           |                                                                                    |
| 24 c     | -2.994926 | -3.873435 | -                                                                                  |
| 1.350297 |           |           |                                                                                    |
| 25 c     | 3.163800  | -3.741957 | -                                                                                  |
| 1.341567 |           |           |                                                                                    |

|          |           |           |   |
|----------|-----------|-----------|---|
| 26 c     | -3.542666 | -3.324553 | - |
| 2.306685 |           |           |   |
| 27 c     | 3.688333  | -3.168941 | - |
| 2.296809 |           |           |   |
| 28 c     | -3.624732 | -2.450721 | - |
| 3.339083 |           |           |   |
| 29 c     | 3.736071  | -2.293718 | - |
| 3.330039 |           |           |   |
| 30 c     | -2.995167 | -1.556589 | - |
| 3.909874 |           |           |   |
| 31 c     | 3.068733  | -1.427321 | - |
| 3.900844 |           |           |   |
| 32 c     | -1.875477 | -0.797509 | - |
| 4.289007 |           |           |   |
| 33 c     | 1.919335  | -0.716474 | - |
| 4.283625 |           |           |   |
| 34 c     | -0.682612 | -1.489769 | - |
| 4.164609 |           |           |   |
| 35 c     | 0.756715  | -1.459059 | - |
| 4.162425 |           |           |   |
| 36 c     | 0.059002  | -2.532778 | - |
| 3.574270 |           |           |   |
| 37 c     | -0.048463 | 2.494792  | - |
| 3.597302 |           |           |   |
| 38 c     | -0.744446 | 1.415433  | - |
| 4.177752 |           |           |   |
| 39 c     | 0.694920  | 1.446498  | - |
| 4.175298 |           |           |   |
| 40 c     | -1.906723 | 0.671987  | - |
| 4.295683 |           |           |   |
| 41 c     | 1.888092  | 0.753058  | - |
| 4.290123 |           |           |   |
| 42 c     | -3.058008 | 1.386293  | - |
| 3.924118 |           |           |   |
| 43 c     | 3.006293  | 1.515419  | - |
| 3.913757 |           |           |   |
| 44 c     | -3.724899 | 2.258015  | - |
| 3.361287 |           |           |   |
| 45 c     | 3.635723  | 2.414682  | - |
| 3.350824 |           |           |   |
| 46 c     | -3.681656 | 3.145399  | - |
| 2.338226 |           |           |   |
| 47 c     | 3.550317  | 3.297514  | - |
| 2.326425 |           |           |   |
| 48 c     | -3.157319 | 3.725734  | - |
| 1.387401 |           |           |   |
| 49 c     | 3.001313  | 3.857549  | - |
| 1.377251 |           |           |   |
| 50 c     | -1.972472 | 3.947846  | - |
| 0.647979 |           |           |   |

|    |               |           |          |   |
|----|---------------|-----------|----------|---|
|    | 51 c          | 1.804760  | 4.027582 | - |
|    | 0.642048      |           |          |   |
|    | 52 c          | -0.792812 | 3.820681 | - |
|    | 1.371266      |           |          |   |
|    | 53 c          | 0.634069  | 3.850347 | - |
|    | 1.369051      |           |          |   |
|    | 54 c          | -0.068365 | 3.376447 | - |
|    | 2.495246      |           |          |   |
|    | 55 c          | -0.061943 | 2.760902 |   |
|    | 2.434346      |           |          |   |
|    | 56 c          | -0.769850 | 3.570513 |   |
|    | 1.517207      |           |          |   |
|    | 57 c          | 0.610233  | 3.601536 |   |
|    | 1.518515      |           |          |   |
|    | 58 c          | -1.963539 | 3.954450 |   |
|    | 0.804875      |           |          |   |
|    | 59 c          | 1.790132  | 4.034254 |   |
|    | 0.810655      |           |          |   |
|    | 60 c          | -3.072361 | 3.974970 |   |
|    | 1.604237      |           |          |   |
|    | 61 c          | 2.893101  | 4.102026 |   |
|    | 1.615082      |           |          |   |
|    | 62 c          | -3.797611 | 3.757020 |   |
|    | 2.604662      |           |          |   |
|    | 63 c          | 3.624604  | 3.913563 |   |
|    | 2.617003      |           |          |   |
|    | 64 c          | -3.877927 | 2.731085 |   |
|    | 3.441872      |           |          |   |
|    | 65 c          | 3.746139  | 2.892006 |   |
|    | 3.454704      |           |          |   |
|    | 66 c          | -3.521056 | 1.680021 |   |
|    | 4.018914      |           |          |   |
|    | 67 c          | 3.431380  | 1.828883 |   |
|    | 4.034022      |           |          |   |
|    | 68 c          | -2.582113 | 0.702883 |   |
|    | 3.906068      |           |          |   |
|    | 69 c          | 2.534924  | 0.812996 |   |
|    | 3.920258      |           |          |   |
|    | 70 c          | -1.172712 | 0.720063 |   |
|    | 3.534190      |           |          |   |
|    | 71 c          | 1.126966  | 0.770687 |   |
|    | 3.541652      |           |          |   |
|    | 72 c          | -0.038523 | 1.549774 |   |
|    | 3.227212      |           |          |   |
| 11 | SIC72-sheet-2 |           |          |   |

|  |          |           |           |                                                                                    |
|--|----------|-----------|-----------|------------------------------------------------------------------------------------|
|  | 1 c      | 10.710064 | 0.000000  | 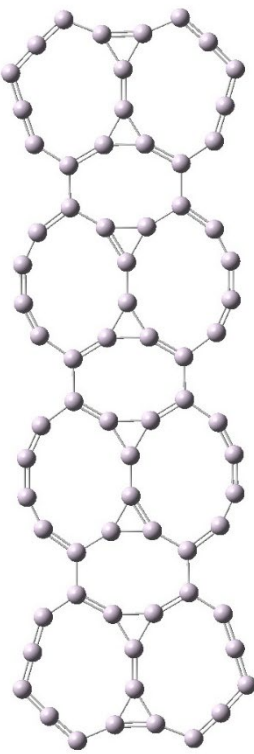 |
|  | 0.044499 |           |           |                                                                                    |
|  | 2 c      | 11.930571 | -0.706378 |                                                                                    |
|  | 0.070806 |           |           |                                                                                    |
|  | 3 c      | 11.930571 | 0.706378  |                                                                                    |
|  | 0.070806 |           |           |                                                                                    |
|  | 4 c      | 12.458754 | -2.004545 |                                                                                    |
|  | 0.085895 |           |           |                                                                                    |
|  | 5 c      | 12.458754 | 2.004545  |                                                                                    |
|  | 0.085895 |           |           |                                                                                    |
|  | 6 c      | 11.597117 | -2.956500 |                                                                                    |
|  | 0.070013 |           |           |                                                                                    |
|  | 7 c      | 11.597117 | 2.956500  |                                                                                    |
|  | 0.070013 |           |           |                                                                                    |
|  | 8 c      | 10.642200 | -3.868670 |                                                                                    |
|  | 0.054745 |           |           |                                                                                    |
|  | 9 c      | 10.642200 | 3.868670  |                                                                                    |
|  | 0.054745 |           |           |                                                                                    |
|  | 10 c     | 9.381025  | -3.488230 |                                                                                    |
|  | 0.031426 |           |           |                                                                                    |
|  | 11 c     | 9.381025  | 3.488230  |                                                                                    |
|  | 0.031426 |           |           |                                                                                    |
|  | 12 c     | 8.168513  | -3.099622 |                                                                                    |
|  | 0.011532 |           |           |                                                                                    |
|  | 13 c     | 8.168513  | 3.099622  |                                                                                    |
|  | 0.011532 |           |           |                                                                                    |
|  | 14 c     | 7.416517  | -1.935697 | -                                                                                  |
|  | 0.002831 |           |           |                                                                                    |
|  | 15 c     | 7.416517  | 1.935697  | -                                                                                  |
|  | 0.002831 |           |           |                                                                                    |
|  | 16 c     | 8.109971  | -0.704109 |                                                                                    |
|  | 0.003562 |           |           |                                                                                    |
|  | 17 c     | 8.109971  | 0.704109  |                                                                                    |
|  | 0.003562 |           |           |                                                                                    |
|  | 18 c     | 9.321174  | 0.000000  |                                                                                    |
|  | 0.020548 |           |           |                                                                                    |
|  | 19 c     | 4.041408  | 0.000000  | -                                                                                  |
|  | 0.041048 |           |           |                                                                                    |
|  | 20 c     | 5.251837  | -0.714085 | -                                                                                  |
|  | 0.030574 |           |           |                                                                                    |
|  | 21 c     | 5.251837  | 0.714085  | -                                                                                  |
|  | 0.030574 |           |           |                                                                                    |
|  | 22 c     | 5.954220  | -1.911375 | -                                                                                  |
|  | 0.020934 |           |           |                                                                                    |
|  | 23 c     | 5.954220  | 1.911375  | -                                                                                  |
|  | 0.020934 |           |           |                                                                                    |
|  | 24 c     | 5.125183  | -3.043555 | -                                                                                  |
|  | 0.026536 |           |           |                                                                                    |
|  | 25 c     | 5.125183  | 3.043555  | -                                                                                  |
|  | 0.026536 |           |           |                                                                                    |



|          |           |           |   |
|----------|-----------|-----------|---|
| 26 c     | 4.015993  | -3.585414 | - |
| 0.033685 |           |           |   |
| 27 c     | 4.015993  | 3.585414  | - |
| 0.033685 |           |           |   |
| 28 c     | 2.671497  | -3.577107 | - |
| 0.042533 |           |           |   |
| 29 c     | 2.671497  | 3.577107  | - |
| 0.042533 |           |           |   |
| 30 c     | 1.555011  | -3.049630 | - |
| 0.048754 |           |           |   |
| 31 c     | 1.555011  | 3.049630  | - |
| 0.048754 |           |           |   |
| 32 c     | 0.734894  | -1.909181 | - |
| 0.053861 |           |           |   |
| 33 c     | 0.734894  | 1.909181  | - |
| 0.053861 |           |           |   |
| 34 c     | 1.437613  | -0.719837 | - |
| 0.055119 |           |           |   |
| 35 c     | 1.437613  | 0.719837  | - |
| 0.055119 |           |           |   |
| 36 c     | 2.643234  | 0.000000  | - |
| 0.050301 |           |           |   |
| 37 c     | -2.643234 | 0.000000  | - |
| 0.050301 |           |           |   |
| 38 c     | -1.437613 | -0.719837 | - |
| 0.055119 |           |           |   |
| 39 c     | -1.437613 | 0.719837  | - |
| 0.055119 |           |           |   |
| 40 c     | -0.734894 | -1.909181 | - |
| 0.053861 |           |           |   |
| 41 c     | -0.734894 | 1.909181  | - |
| 0.053861 |           |           |   |
| 42 c     | -1.555011 | -3.049630 | - |
| 0.048754 |           |           |   |
| 43 c     | -1.555011 | 3.049630  | - |
| 0.048754 |           |           |   |
| 44 c     | -2.671497 | -3.577107 | - |
| 0.042533 |           |           |   |
| 45 c     | -2.671497 | 3.577107  | - |
| 0.042533 |           |           |   |
| 46 c     | -4.015993 | -3.585414 | - |
| 0.033685 |           |           |   |
| 47 c     | -4.015993 | 3.585414  | - |
| 0.033685 |           |           |   |
| 48 c     | -5.125183 | -3.043555 | - |
| 0.026536 |           |           |   |
| 49 c     | -5.125183 | 3.043555  | - |
| 0.026536 |           |           |   |
| 50 c     | -5.954220 | -1.911375 | - |
| 0.020934 |           |           |   |

|    |                                                                                                                                                                                                                                                                                                                                                                                                                                                                                                                                                                                                                                                                                                                                                                                                                                                                                                                                                                                                                                                                            |                                                                                      |
|----|----------------------------------------------------------------------------------------------------------------------------------------------------------------------------------------------------------------------------------------------------------------------------------------------------------------------------------------------------------------------------------------------------------------------------------------------------------------------------------------------------------------------------------------------------------------------------------------------------------------------------------------------------------------------------------------------------------------------------------------------------------------------------------------------------------------------------------------------------------------------------------------------------------------------------------------------------------------------------------------------------------------------------------------------------------------------------|--------------------------------------------------------------------------------------|
|    | 51 c    -5.954220    1.911375    -<br>0.020934<br>52 c    -5.251837    -0.714085    -<br>0.030574<br>53 c    -5.251837    0.714085    -<br>0.030574<br>54 c    -4.041408    0.000000    -<br>0.041048<br>55 c    -9.321174    0.000000<br>0.020548<br>56 c    -8.109971    -0.704109<br>0.003562<br>57 c    -8.109971    0.704109<br>0.003562<br>58 c    -7.416517    -1.935697    -<br>0.002831<br>59 c    -7.416517    1.935697    -<br>0.002831<br>60 c    -8.168513    -3.099622<br>0.011532<br>61 c    -8.168513    3.099622<br>0.011532<br>62 c    -9.381025    -3.488230<br>0.031426<br>63 c    -9.381025    3.488230<br>0.031426<br>64 c    -10.642200    -3.868670<br>0.054745<br>65 c    -10.642200    3.868670<br>0.054745<br>66 c    -11.597117    -2.956500<br>0.070013<br>67 c    -11.597117    2.956500<br>0.070013<br>68 c    -12.458754    -2.004545<br>0.085895<br>69 c    -12.458754    2.004545<br>0.085895<br>70 c    -11.930571    -0.706378<br>0.070806<br>71 c    -11.930571    0.706378<br>0.070806<br>72 c    -10.710064    0.000000<br>0.044499 |                                                                                      |
| 12 | <sup>51</sup> C <sub>72-tube-2</sub>                                                                                                                                                                                                                                                                                                                                                                                                                                                                                                                                                                                                                                                                                                                                                                                                                                                                                                                                                                                                                                       |                                                                                      |
|    | 1 c    0.017687    -2.491164    -<br>3.582848<br>2 c    -0.701889    -1.415347    -<br>4.134293<br>3 c    0.723059    -1.405975    -<br>4.134008                                                                                                                                                                                                                                                                                                                                                                                                                                                                                                                                                                                                                                                                                                                                                                                                                                                                                                                           | 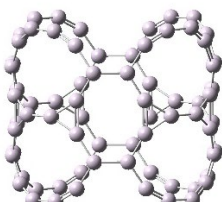 |

|          |           |           |   |
|----------|-----------|-----------|---|
| 4 c      | -1.891310 | -0.695463 | - |
| 4.275618 |           |           |   |
| 5 c      | 1.902987  | -0.670342 | - |
| 4.274659 |           |           |   |
| 6 c      | -3.029339 | -1.449941 | - |
| 3.946937 |           |           |   |
| 7 c      | 3.050475  | -1.409729 | - |
| 3.945226 |           |           |   |
| 8 c      | -3.635794 | -2.367150 | - |
| 3.388783 |           |           |   |
| 9 c      | 3.669602  | -2.319416 | - |
| 3.388465 |           |           |   |
| 10 c     | -3.602908 | -3.300720 | - |
| 2.412263 |           |           |   |
| 11 c     | 3.647619  | -3.252160 | - |
| 2.410904 |           |           |   |
| 12 c     | -3.029296 | -3.892967 | - |
| 1.496820 |           |           |   |
| 13 c     | 3.082759  | -3.853029 | - |
| 1.495638 |           |           |   |
| 14 c     | -1.869203 | -4.182526 | - |
| 0.752110 |           |           |   |
| 15 c     | 1.926060  | -4.156986 | - |
| 0.751221 |           |           |   |
| 16 c     | -0.685421 | -4.018956 | - |
| 1.475444 |           |           |   |
| 17 c     | 0.740534  | -4.009337 | - |
| 1.475105 |           |           |   |
| 18 c     | 0.024190  | -3.481282 | - |
| 2.564793 |           |           |   |
| 19 c     | 0.023322  | -3.543491 |   |
| 2.527204 |           |           |   |
| 20 c     | -0.686110 | -4.056049 |   |
| 1.425589 |           |           |   |
| 21 c     | 0.740389  | -4.046303 |   |
| 1.425917 |           |           |   |
| 22 c     | -1.869719 | -4.201475 |   |
| 0.698076 |           |           |   |
| 23 c     | 1.926169  | -4.175531 |   |
| 0.698952 |           |           |   |
| 24 c     | -3.031742 | -3.932743 |   |
| 1.447911 |           |           |   |
| 25 c     | 3.084281  | -3.890811 |   |
| 1.449053 |           |           |   |
| 26 c     | -3.604323 | -3.356112 |   |
| 2.373618 |           |           |   |
| 27 c     | 3.648107  | -3.306012 |   |
| 2.375000 |           |           |   |
| 28 c     | -3.642379 | -2.442525 |   |
| 3.368557 |           |           |   |

|          |           |           |
|----------|-----------|-----------|
| 29 c     | 3.673773  | -2.392170 |
| 3.370064 |           |           |
| 30 c     | -3.030406 | -1.534060 |
| 3.935345 |           |           |
| 31 c     | 3.048227  | -1.493725 |
| 3.937928 |           |           |
| 32 c     | -1.893481 | -0.782594 |
| 4.271804 |           |           |
| 33 c     | 1.901210  | -0.757422 |
| 4.273559 |           |           |
| 34 c     | -0.703563 | -1.502031 |
| 4.127163 |           |           |
| 35 c     | 0.721052  | -1.492673 |
| 4.128014 |           |           |
| 36 c     | 0.016274  | -2.571029 |
| 3.562820 |           |           |
| 37 c     | -0.017687 | 2.491164  |
| 3.582848 |           |           |
| 38 c     | -0.723059 | 1.405975  |
| 4.134008 |           |           |
| 39 c     | 0.701889  | 1.415347  |
| 4.134293 |           |           |
| 40 c     | -1.902987 | 0.670342  |
| 4.274659 |           |           |
| 41 c     | 1.891310  | 0.695463  |
| 4.275618 |           |           |
| 42 c     | -3.050475 | 1.409729  |
| 3.945226 |           |           |
| 43 c     | 3.029339  | 1.449941  |
| 3.946937 |           |           |
| 44 c     | -3.669602 | 2.319416  |
| 3.388465 |           |           |
| 45 c     | 3.635794  | 2.367150  |
| 3.388783 |           |           |
| 46 c     | -3.647619 | 3.252160  |
| 2.410904 |           |           |
| 47 c     | 3.602908  | 3.300720  |
| 2.412263 |           |           |
| 48 c     | -3.082759 | 3.853029  |
| 1.495638 |           |           |
| 49 c     | 3.029296  | 3.892967  |
| 1.496820 |           |           |
| 50 c     | -1.926060 | 4.156986  |
| 0.751221 |           |           |
| 51 c     | 1.869203  | 4.182526  |
| 0.752110 |           |           |
| 52 c     | -0.740534 | 4.009337  |
| 1.475105 |           |           |
| 53 c     | 0.685421  | 4.018956  |
| 1.475444 |           |           |

|    |                                |           |          |           |
|----|--------------------------------|-----------|----------|-----------|
|    | 54 c                           | -0.024190 | 3.481282 |           |
|    | 2.564793                       |           |          |           |
|    | 55 c                           | -0.023322 | 3.543491 | -         |
|    | 2.527204                       |           |          |           |
|    | 56 c                           | -0.740389 | 4.046303 | -         |
|    | 1.425917                       |           |          |           |
|    | 57 c                           | 0.686110  | 4.056049 | -         |
|    | 1.425589                       |           |          |           |
|    | 58 c                           | -1.926169 | 4.175531 | -         |
|    | 0.698952                       |           |          |           |
|    | 59 c                           | 1.869719  | 4.201475 | -         |
|    | 0.698076                       |           |          |           |
|    | 60 c                           | -3.084281 | 3.890811 | -         |
|    | 1.449053                       |           |          |           |
|    | 61 c                           | 3.031742  | 3.932743 | -         |
|    | 1.447911                       |           |          |           |
|    | 62 c                           | -3.648107 | 3.306012 | -         |
|    | 2.375000                       |           |          |           |
|    | 63 c                           | 3.604323  | 3.356112 | -         |
|    | 2.373618                       |           |          |           |
|    | 64 c                           | -3.673773 | 2.392170 | -         |
|    | 3.370064                       |           |          |           |
|    | 65 c                           | 3.642379  | 2.442525 | -         |
|    | 3.368557                       |           |          |           |
|    | 66 c                           | -3.048227 | 1.493725 | -         |
|    | 3.937928                       |           |          |           |
|    | 67 c                           | 3.030406  | 1.534060 | -         |
|    | 3.935345                       |           |          |           |
|    | 68 c                           | -1.901210 | 0.757422 | -         |
|    | 4.273559                       |           |          |           |
|    | 69 c                           | 1.893481  | 0.782594 | -         |
|    | 4.271804                       |           |          |           |
|    | 70 c                           | -0.721052 | 1.492673 | -         |
|    | 4.128014                       |           |          |           |
|    | 71 c                           | 0.703563  | 1.502031 | -         |
|    | 4.127163                       |           |          |           |
|    | 72 c                           | -0.016274 | 2.571029 | -         |
|    | 3.562820                       |           |          |           |
| 13 | S <sup>2</sup> C <sub>18</sub> |           |          |           |
|    | 1 c                            | -0.721595 | 0.000000 | -0.729585 |
|    | 2 c                            | 0.721595  | 0.000000 | -0.729585 |
|    | 3 c                            | -1.731979 | 0.000000 | -1.605633 |
|    | 4 c                            | 1.731979  | 0.000000 | -1.605633 |
|    | 5 c                            | -3.014192 | 0.000000 | -1.602289 |
|    | 6 c                            | 3.014192  | 0.000000 | -1.602289 |
|    | 7 c                            | -4.325377 | 0.000000 | -1.379802 |
|    | 8 c                            | 4.325377  | 0.000000 | -1.379802 |
|    | 9 c                            | -4.443712 | 0.000000 | -0.082012 |
|    | 10 c                           | 4.443712  | 0.000000 | -0.082012 |
|    | 11 c                           | -4.291848 | 0.000000 | 1.229492  |
|    | 12 c                           | 4.291848  | 0.000000 | 1.229492  |

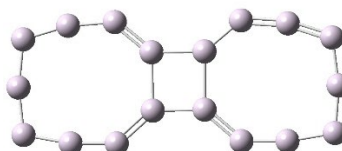

|    |                    |           |           |          |                                                                                      |
|----|--------------------|-----------|-----------|----------|--------------------------------------------------------------------------------------|
|    | 13 c               | -3.050804 | 0.000000  | 1.607466 |                                                                                      |
|    | 14 c               | 3.050804  | 0.000000  | 1.607466 |                                                                                      |
|    | 15 c               | -1.752706 | 0.000000  | 1.699829 |                                                                                      |
|    | 16 c               | 1.752706  | 0.000000  | 1.699829 |                                                                                      |
|    | 17 c               | -0.735091 | 0.000000  | 0.862533 |                                                                                      |
|    | 18 c               | 0.735091  | 0.000000  | 0.862533 |                                                                                      |
| 14 | $s^2C_{18}$ (TS1)  |           |           |          |                                                                                      |
|    | 1 c                | 0.481533  | -0.954170 | 0.000000 | 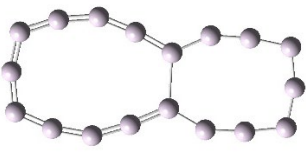   |
|    | 2 c                | -0.781672 | -1.402172 | 0.000000 |                                                                                      |
|    | 3 c                | 1.607228  | -1.703532 | 0.000000 |                                                                                      |
|    | 4 c                | -2.020011 | -1.679490 | 0.000000 |                                                                                      |
|    | 5 c                | 2.864244  | -1.837111 | 0.000000 |                                                                                      |
|    | 6 c                | -3.279589 | -1.376456 | 0.000000 |                                                                                      |
|    | 7 c                | 4.199496  | -1.783781 | 0.000000 |                                                                                      |
|    | 8 c                | -4.428811 | -0.782373 | 0.000000 |                                                                                      |
|    | 9 c                | 4.542358  | -0.522936 | 0.000000 |                                                                                      |
|    | 10 c               | -4.481608 | 0.516007  | 0.000000 |                                                                                      |
|    | 11 c               | 4.495241  | 0.782844  | 0.000000 |                                                                                      |
|    | 12 c               | -4.135133 | 1.768432  | 0.000000 |                                                                                      |
|    | 13 c               | 3.207029  | 1.138273  | 0.000000 |                                                                                      |
|    | 14 c               | -2.880932 | 2.085693  | 0.000000 |                                                                                      |
|    | 15 c               | 1.952534  | 1.293512  | 0.000000 |                                                                                      |
|    | 16 c               | -1.585450 | 2.094338  | 0.000000 |                                                                                      |
|    | 17 c               | 0.685967  | 0.819823  | 0.000000 |                                                                                      |
|    | 18 c               | -0.442423 | 1.543100  | 0.000000 |                                                                                      |
| 15 | $s^2C_{18}^{prim}$ |           |           |          |                                                                                      |
|    | 1 c                | 0.482352  | -0.837350 | -        |  |
|    |                    | 0.137773  |           |          |                                                                                      |
|    | 2 c                | -0.748480 | -1.336390 |          |                                                                                      |
|    |                    | 0.129027  |           |          |                                                                                      |
|    | 3 c                | 1.550066  | -1.658564 | -        |                                                                                      |
|    |                    | 0.471933  |           |          |                                                                                      |
|    | 4 c                | -1.955870 | -1.653614 |          |                                                                                      |
|    |                    | 0.363952  |           |          |                                                                                      |
|    | 5 c                | 2.803811  | -1.772843 | -        |                                                                                      |
|    |                    | 0.452398  |           |          |                                                                                      |
|    | 6 c                | -3.215505 | -1.352473 |          |                                                                                      |
|    |                    | 0.396551  |           |          |                                                                                      |
|    | 7 c                | 4.147212  | -1.729068 | -        |  |
|    |                    | 0.364315  |           |          |                                                                                      |
|    | 8 c                | -4.355827 | -0.740563 |          |                                                                                      |
|    |                    | 0.343083  |           |          |                                                                                      |
|    | 9 c                | 4.459375  | -0.511228 | -        |                                                                                      |
|    |                    | 0.003572  |           |          |                                                                                      |
|    | 10 c               | -4.426401 | 0.510065  | -        |                                                                                      |
|    |                    | 0.000348  |           |          |                                                                                      |
|    | 11 c               | 4.431504  | 0.745291  |          |                                                                                      |
|    |                    | 0.358769  |           |          |                                                                                      |
|    | 12 c               | -4.073184 | 1.711739  | -        |                                                                                      |
|    |                    | 0.343346  |           |          |                                                                                      |

|    |                                                                                                                                                                                                                                                                                                                                                                                                                                                                                                                                                                                                                                                                                                                                                                                                                                                                   |                                                                                    |
|----|-------------------------------------------------------------------------------------------------------------------------------------------------------------------------------------------------------------------------------------------------------------------------------------------------------------------------------------------------------------------------------------------------------------------------------------------------------------------------------------------------------------------------------------------------------------------------------------------------------------------------------------------------------------------------------------------------------------------------------------------------------------------------------------------------------------------------------------------------------------------|------------------------------------------------------------------------------------|
|    | 13 c      3.132813    1.090723<br>0.450370<br>14 c      -2.823171    2.047758    -<br>0.395511<br>15 c      1.885547    1.261289<br>0.473454<br>16 c      -1.528278    2.053518    -<br>0.361436<br>17 c      0.659359    0.702783<br>0.141149<br>18 c      -0.425324    1.468929    -<br>0.125722                                                                                                                                                                                                                                                                                                                                                                                                                                                                                                                                                                |                                                                                    |
| 16 | <sup>S2</sup> C <sub>18</sub> (TS2)                                                                                                                                                                                                                                                                                                                                                                                                                                                                                                                                                                                                                                                                                                                                                                                                                               |                                                                                    |
|    | 1 c      0.642158    -0.815216<br>0.000000<br>2 c      -0.795534    -0.763911<br>0.000000<br>3 c      1.523138    -1.831355<br>0.000000<br>4 c      -1.923110    -1.433900<br>0.000000<br>5 c      2.802117    -1.931722<br>0.000000<br>6 c      -3.204408    -1.265062<br>0.000000<br>7 c      4.123088    -1.819948<br>0.000000<br>8 c      -4.452341    -0.850067<br>0.000000<br>9 c      4.407989    -0.545664<br>0.000000<br>10 c      -4.424936    0.456913<br>0.000000<br>11 c      4.419796    0.770538<br>0.000000<br>12 c      -4.114897    1.732987<br>0.000000<br>13 c      3.200038    1.244639<br>0.000000<br>14 c      -2.837752    1.961408<br>0.000000<br>15 c      1.927049    1.472653<br>0.000000<br>16 c      -1.536906    1.899682<br>0.000000<br>17 c      0.832675    0.711244<br>0.000000<br>18 c      -0.588164    1.006782<br>0.000000 | 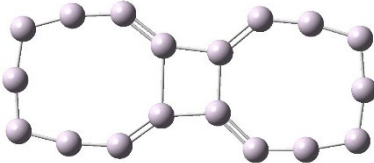 |
| 17 | <sup>S2</sup> C <sub>36-ribbon-1</sub>                                                                                                                                                                                                                                                                                                                                                                                                                                                                                                                                                                                                                                                                                                                                                                                                                            |                                                                                    |

|  |          |           |           |                                                                                     |
|--|----------|-----------|-----------|-------------------------------------------------------------------------------------|
|  | 1 c      | -5.982701 | 0.057665  | 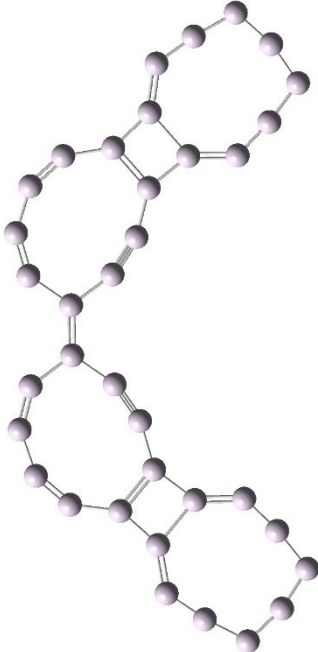 |
|  | 0.000000 |           |           |                                                                                     |
|  | 2 c      | -5.017452 | 1.076658  |                                                                                     |
|  | 0.000000 |           |           |                                                                                     |
|  | 3 c      | -7.331697 | -0.143554 |                                                                                     |
|  | 0.000000 |           |           |                                                                                     |
|  | 4 c      | -4.806914 | 2.461461  |                                                                                     |
|  | 0.000000 |           |           |                                                                                     |
|  | 5 c      | -8.072773 | -1.179468 |                                                                                     |
|  | 0.000000 |           |           |                                                                                     |
|  | 6 c      | -3.983533 | 3.381415  |                                                                                     |
|  | 0.000000 |           |           |                                                                                     |
|  | 7 c      | -8.709872 | -2.352391 |                                                                                     |
|  | 0.000000 |           |           |                                                                                     |
|  | 8 c      | -2.690708 | 3.792558  |                                                                                     |
|  | 0.000000 |           |           |                                                                                     |
|  | 9 c      | -7.830993 | -3.320672 |                                                                                     |
|  | 0.000000 |           |           |                                                                                     |
|  | 10 c     | -1.501810 | 3.461354  |                                                                                     |
|  | 0.000000 |           |           |                                                                                     |
|  | 11 c     | -6.745092 | -4.046595 |                                                                                     |
|  | 0.000000 |           |           |                                                                                     |
|  | 12 c     | -0.677299 | 2.293842  |                                                                                     |
|  | 0.000000 |           |           |                                                                                     |
|  | 13 c     | -5.678111 | -3.242283 |                                                                                     |
|  | 0.000000 |           |           |                                                                                     |
|  | 14 c     | -1.514203 | 1.140709  |                                                                                     |
|  | 0.000000 |           |           |                                                                                     |
|  | 15 c     | -4.765819 | -2.355075 |                                                                                     |
|  | 0.000000 |           |           |                                                                                     |
|  | 16 c     | -2.539652 | 0.466719  |                                                                                     |
|  | 0.000000 |           |           |                                                                                     |
|  | 17 c     | -4.765638 | -0.990626 |                                                                                     |
|  | 0.000000 |           |           |                                                                                     |
|  | 18 c     | -3.894518 | 0.111372  |                                                                                     |
|  | 0.000000 |           |           |                                                                                     |
|  | 19 c     | 5.032210  | 1.005467  |                                                                                     |
|  | 0.000000 |           |           |                                                                                     |
|  | 20 c     | 5.982906  | -0.027108 |                                                                                     |
|  | 0.000000 |           |           |                                                                                     |
|  | 21 c     | 4.841482  | 2.393167  |                                                                                     |
|  | 0.000000 |           |           |                                                                                     |
|  | 22 c     | 7.328915  | -0.247427 |                                                                                     |
|  | 0.000000 |           |           |                                                                                     |
|  | 23 c     | 4.030907  | 3.324423  |                                                                                     |
|  | 0.000000 |           |           |                                                                                     |
|  | 24 c     | 8.055222  | -1.293741 |                                                                                     |
|  | 0.000000 |           |           |                                                                                     |
|  | 25 c     | 2.744180  | 3.754261  |                                                                                     |
|  | 0.000000 |           |           |                                                                                     |



|    |                                                                                                                                                                                                                                                                                                                                                                                                                                                                                                                                                     |                                                                                      |
|----|-----------------------------------------------------------------------------------------------------------------------------------------------------------------------------------------------------------------------------------------------------------------------------------------------------------------------------------------------------------------------------------------------------------------------------------------------------------------------------------------------------------------------------------------------------|--------------------------------------------------------------------------------------|
|    | 26 c 8.675658 -2.475556<br>0.000000<br>27 c 1.550843 3.439486<br>0.000000<br>28 c 7.783168 -3.431306<br>0.000000<br>29 c 0.709678 2.283944<br>0.000000<br>30 c 6.687099 -4.141782<br>0.000000<br>31 c 1.530098 1.119036<br>0.000000<br>32 c 5.631608 -3.322429<br>0.000000<br>33 c 2.545997 0.430718<br>0.000000<br>34 c 4.731988 -2.422377<br>0.000000<br>35 c 3.895707 0.056191<br>0.000000<br>36 c 4.751119 -1.058054<br>0.000000                                                                                                                |                                                                                      |
| 18 | <sup>S2</sup> C <sub>36</sub> -ribbon-1 (TS)                                                                                                                                                                                                                                                                                                                                                                                                                                                                                                        |                                                                                      |
|    | 1 c 6.361480 0.000000<br>0.389191<br>2 c 5.116854 0.000000<br>1.043993<br>3 c 7.701391 0.000000<br>0.636969<br>4 c 4.493342 0.000000<br>2.295773<br>5 c 8.740215 0.000000 -<br>0.102457<br>6 c 3.369690 0.000000<br>2.831375<br>7 c 9.724073 0.000000 -<br>1.001751<br>8 c 2.038929 0.000000<br>2.961851<br>9 c 9.208609 0.000000 -<br>2.205462<br>10 c 0.975408 0.000000<br>2.275578<br>11 c 8.419501 0.000000 -<br>3.244695<br>12 c 0.698129 0.000000<br>0.846165<br>13 c 7.148436 0.000000 -<br>2.829206<br>14 c 1.786845 0.000000 -<br>0.034707 | 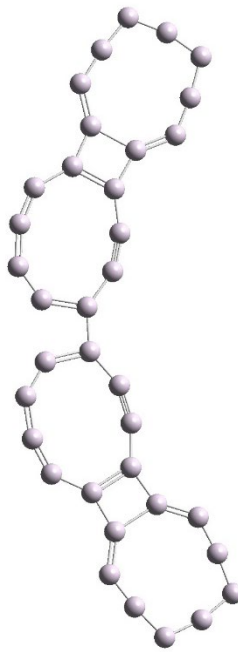 |

|    |                             |           |          |   |  |
|----|-----------------------------|-----------|----------|---|--|
|    | 15 c                        | 5.996880  | 0.000000 | - |  |
|    | 2.288388                    |           |          |   |  |
|    | 16 c                        | 2.979267  | 0.000000 | - |  |
|    | 0.336089                    |           |          |   |  |
|    | 17 c                        | 5.554510  | 0.000000 | - |  |
|    | 0.997897                    |           |          |   |  |
|    | 18 c                        | 4.371291  | 0.000000 | - |  |
|    | 0.240243                    |           |          |   |  |
|    | 19 c                        | -5.116854 | 0.000000 |   |  |
|    | 1.043993                    |           |          |   |  |
|    | 20 c                        | -6.361480 | 0.000000 |   |  |
|    | 0.389191                    |           |          |   |  |
|    | 21 c                        | -4.493342 | 0.000000 |   |  |
|    | 2.295773                    |           |          |   |  |
|    | 22 c                        | -7.701391 | 0.000000 |   |  |
|    | 0.636969                    |           |          |   |  |
|    | 23 c                        | -3.369690 | 0.000000 |   |  |
|    | 2.831375                    |           |          |   |  |
|    | 24 c                        | -8.740215 | 0.000000 | - |  |
|    | 0.102457                    |           |          |   |  |
|    | 25 c                        | -2.038929 | 0.000000 |   |  |
|    | 2.961851                    |           |          |   |  |
|    | 26 c                        | -9.724073 | 0.000000 | - |  |
|    | 1.001751                    |           |          |   |  |
|    | 27 c                        | -0.975408 | 0.000000 |   |  |
|    | 2.275578                    |           |          |   |  |
|    | 28 c                        | -9.208609 | 0.000000 | - |  |
|    | 2.205462                    |           |          |   |  |
|    | 29 c                        | -0.698129 | 0.000000 |   |  |
|    | 0.846165                    |           |          |   |  |
|    | 30 c                        | -8.419501 | 0.000000 | - |  |
|    | 3.244695                    |           |          |   |  |
|    | 31 c                        | -1.786845 | 0.000000 | - |  |
|    | 0.034707                    |           |          |   |  |
|    | 32 c                        | -7.148436 | 0.000000 | - |  |
|    | 2.829206                    |           |          |   |  |
|    | 33 c                        | -2.979267 | 0.000000 | - |  |
|    | 0.336089                    |           |          |   |  |
|    | 34 c                        | -5.996880 | 0.000000 | - |  |
|    | 2.288388                    |           |          |   |  |
|    | 35 c                        | -4.371291 | 0.000000 | - |  |
|    | 0.240243                    |           |          |   |  |
|    | 36 c                        | -5.554510 | 0.000000 | - |  |
|    | 0.997897                    |           |          |   |  |
| 19 | S2C <sub>36</sub> -ribbon-2 |           |          |   |  |

|  |          |           |           |                                                                                     |
|--|----------|-----------|-----------|-------------------------------------------------------------------------------------|
|  | 1 c      | -6.346158 | 0.499388  | 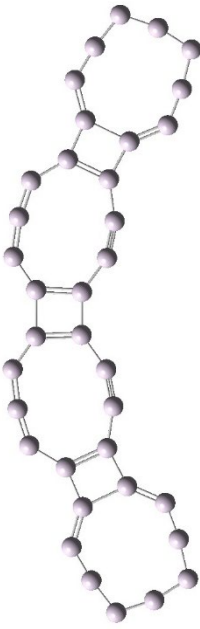 |
|  | 0.000000 |           |           |                                                                                     |
|  | 2 c      | -5.048172 | 1.051790  |                                                                                     |
|  | 0.000000 |           |           |                                                                                     |
|  | 3 c      | -7.657577 | 0.863348  |                                                                                     |
|  | 0.000000 |           |           |                                                                                     |
|  | 4 c      | -4.333071 | 2.244795  |                                                                                     |
|  | 0.000000 |           |           |                                                                                     |
|  | 5 c      | -8.758334 | 0.216921  |                                                                                     |
|  | 0.000000 |           |           |                                                                                     |
|  | 6 c      | -3.132125 | 2.628220  |                                                                                     |
|  | 0.000000 |           |           |                                                                                     |
|  | 7 c      | -9.814167 | -0.594094 |                                                                                     |
|  | 0.000000 |           |           |                                                                                     |
|  | 8 c      | -1.825710 | 2.786874  |                                                                                     |
|  | 0.000000 |           |           |                                                                                     |
|  | 9 c      | -9.403279 | -1.838432 |                                                                                     |
|  | 0.000000 |           |           |                                                                                     |
|  | 10 c     | -0.751720 | 2.031831  |                                                                                     |
|  | 0.000000 |           |           |                                                                                     |
|  | 11 c     | -8.707061 | -2.941256 |                                                                                     |
|  | 0.000000 |           |           |                                                                                     |
|  | 12 c     | -0.701584 | 0.536507  |                                                                                     |
|  | 0.000000 |           |           |                                                                                     |
|  | 13 c     | -7.404823 | -2.638580 |                                                                                     |
|  | 0.000000 |           |           |                                                                                     |
|  | 14 c     | -1.829734 | -0.268679 |                                                                                     |
|  | 0.000000 |           |           |                                                                                     |
|  | 15 c     | -6.211060 | -2.196839 |                                                                                     |
|  | 0.000000 |           |           |                                                                                     |
|  | 16 c     | -3.040677 | -0.500398 |                                                                                     |
|  | 0.000000 |           |           |                                                                                     |
|  | 17 c     | -5.662683 | -0.948643 |                                                                                     |
|  | 0.000000 |           |           |                                                                                     |
|  | 18 c     | -4.415291 | -0.298177 |                                                                                     |
|  | 0.000000 |           |           |                                                                                     |
|  | 19 c     | 5.061586  | 0.984285  |                                                                                     |
|  | 0.000000 |           |           |                                                                                     |
|  | 20 c     | 6.352038  | 0.414572  |                                                                                     |
|  | 0.000000 |           |           |                                                                                     |
|  | 21 c     | 4.362909  | 2.187118  |                                                                                     |
|  | 0.000000 |           |           |                                                                                     |
|  | 22 c     | 7.668250  | 0.760881  |                                                                                     |
|  | 0.000000 |           |           |                                                                                     |
|  | 23 c     | 3.166760  | 2.585345  |                                                                                     |
|  | 0.000000 |           |           |                                                                                     |
|  | 24 c     | 8.760352  | 0.099945  |                                                                                     |
|  | 0.000000 |           |           |                                                                                     |
|  | 25 c     | 1.862644  | 2.763045  |                                                                                     |
|  | 0.000000 |           |           |                                                                                     |

|    |                                                                                                                                                                                                                                                                                                                                                                                                                                                                                                                                                                                  |                                                                                      |
|----|----------------------------------------------------------------------------------------------------------------------------------------------------------------------------------------------------------------------------------------------------------------------------------------------------------------------------------------------------------------------------------------------------------------------------------------------------------------------------------------------------------------------------------------------------------------------------------|--------------------------------------------------------------------------------------|
|    | 26 c 9.805366 -0.724940<br>0.000000<br>27 c 0.779152 2.021614<br>0.000000<br>28 c 9.377946 -1.963757<br>0.000000<br>29 c 0.708842 0.527122<br>0.000000<br>30 c 8.667191 -3.057222<br>0.000000<br>31 c 1.825934 -0.293295<br>0.000000<br>32 c 7.369025 -2.737132<br>0.000000<br>33 c 3.033685 -0.541136<br>0.000000<br>34 c 6.181278 -2.279609<br>0.000000<br>35 c 4.410850 -0.357212<br>0.000000<br>36 c 5.649417 -1.024200<br>0.000000                                                                                                                                          |                                                                                      |
| 20 | <sup>S2</sup> C <sub>72</sub> -ribbon                                                                                                                                                                                                                                                                                                                                                                                                                                                                                                                                            |                                                                                      |
|    | 1 c 12.076686 0.601763 -<br>6.276475<br>2 c 11.900566 0.439032 -<br>4.881238<br>3 c 13.050442 0.737776 -<br>7.220348<br>4 c 12.587990 0.242934 -<br>3.691029<br>5 c 13.057793 0.846400 -<br>8.491569<br>6 c 12.243134 0.261947 -<br>2.462811<br>7 c 12.902539 0.940524 -<br>9.811315<br>8 c 11.812571 0.122062 -<br>1.230061<br>9 c 11.621966 0.915933 -<br>10.096897<br>10 c 10.588921 0.293576 -<br>0.695893<br>11 c 10.321017 0.851732 -<br>10.067734<br>12 c 9.282617 0.370977 -<br>1.416320<br>13 c 9.923473 0.750624 -<br>8.790198<br>14 c 9.150301 0.386448 -<br>2.790361 | 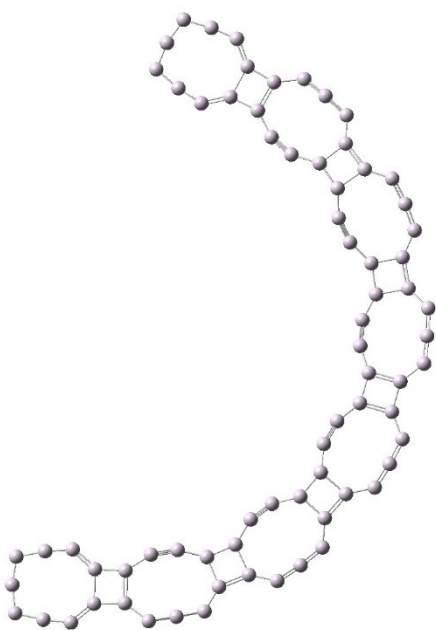 |

|          |           |           |   |
|----------|-----------|-----------|---|
| 15 c     | 9.702436  | 0.639594  | - |
| 7.545340 |           |           |   |
| 16 c     | 9.531499  | 0.409517  | - |
| 3.963935 |           |           |   |
| 17 c     | 10.494096 | 0.581828  | - |
| 6.430485 |           |           |   |
| 18 c     | 10.407904 | 0.460778  | - |
| 5.035618 |           |           |   |
| 19 c     | 6.869074  | -0.738760 |   |
| 3.657112 |           |           |   |
| 20 c     | 5.656494  | -0.879326 |   |
| 4.464773 |           |           |   |
| 21 c     | 8.196145  | -0.452190 |   |
| 3.725902 |           |           |   |
| 22 c     | 5.165870  | -0.767992 |   |
| 5.706404 |           |           |   |
| 23 c     | 9.125999  | -0.206439 |   |
| 2.878225 |           |           |   |
| 24 c     | 3.962494  | -0.714175 |   |
| 6.193785 |           |           |   |
| 25 c     | 9.946703  | 0.074039  |   |
| 1.910064 |           |           |   |
| 26 c     | 2.741643  | -0.643891 |   |
| 6.597443 |           |           |   |
| 27 c     | 9.843712  | 0.233683  |   |
| 0.591266 |           |           |   |
| 28 c     | 1.555209  | -0.613211 |   |
| 5.926288 |           |           |   |
| 29 c     | 8.554559  | 0.270659  | - |
| 0.204408 |           |           |   |
| 30 c     | 1.352306  | -0.542053 |   |
| 4.431300 |           |           |   |
| 31 c     | 7.340652  | -0.089833 |   |
| 0.318902 |           |           |   |
| 32 c     | 2.352770  | -0.665815 |   |
| 3.532231 |           |           |   |
| 33 c     | 6.543943  | -0.503713 |   |
| 1.177362 |           |           |   |
| 34 c     | 3.509380  | -0.869105 |   |
| 3.094910 |           |           |   |
| 35 c     | 6.064145  | -0.852964 |   |
| 2.412652 |           |           |   |
| 36 c     | 4.850700  | -1.013140 |   |
| 3.165289 |           |           |   |
| 37 c     | -4.199160 | -0.199412 |   |
| 5.804150 |           |           |   |
| 38 c     | -5.590903 | -0.228977 |   |
| 5.342537 |           |           |   |
| 39 c     | -3.394112 | -0.441904 |   |
| 6.852476 |           |           |   |

|          |            |           |   |
|----------|------------|-----------|---|
| 40 c     | -6.853841  | -0.529221 |   |
| 5.735438 |            |           |   |
| 41 c     | -2.122454  | -0.590444 |   |
| 7.019159 |            |           |   |
| 42 c     | -7.986630  | -0.595827 |   |
| 5.124943 |            |           |   |
| 43 c     | -0.834599  | -0.699767 |   |
| 7.078679 |            |           |   |
| 44 c     | -9.053674  | -0.703228 |   |
| 4.397918 |            |           |   |
| 45 c     | 0.125910   | -0.682659 |   |
| 6.121698 |            |           |   |
| 46 c     | -9.313134  | -0.597348 |   |
| 3.088524 |            |           |   |
| 47 c     | -0.079029  | -0.544820 |   |
| 4.617529 |            |           |   |
| 48 c     | -8.280551  | -0.516652 |   |
| 1.968947 |            |           |   |
| 49 c     | -1.265982  | -0.264699 |   |
| 4.045741 |            |           |   |
| 50 c     | -6.960477  | -0.267964 |   |
| 2.196320 |            |           |   |
| 51 c     | -2.487510  | 0.009174  |   |
| 3.960695 |            |           |   |
| 52 c     | -5.936201  | -0.020884 |   |
| 2.863158 |            |           |   |
| 53 c     | -3.759953  | 0.144689  |   |
| 4.392044 |            |           |   |
| 54 c     | -5.139616  | 0.103626  |   |
| 3.959907 |            |           |   |
| 55 c     | -12.786877 | 0.355816  | - |
| 1.473621 |            |           |   |
| 56 c     | -13.357566 | 0.420118  | - |
| 2.768419 |            |           |   |
| 57 c     | -13.117889 | 0.337130  | - |
| 0.126149 |            |           |   |
| 58 c     | -14.563741 | 0.406050  | - |
| 3.404705 |            |           |   |
| 59 c     | -12.421509 | 0.064024  |   |
| 0.914112 |            |           |   |
| 60 c     | -14.941938 | 0.492645  | - |
| 4.619394 |            |           |   |
| 61 c     | -11.685673 | -0.053526 |   |
| 1.994489 |            |           |   |
| 62 c     | -15.177801 | 0.604604  | - |
| 5.926551 |            |           |   |
| 63 c     | -10.366758 | -0.367559 |   |
| 2.086855 |            |           |   |
| 64 c     | -14.033308 | 0.699222  | - |
| 6.562083 |            |           |   |

|    |                                                                                                                                                                                                                                                                                                                                                                                                                                                                                                                                                                                                                                                                                                      |                                                                                     |
|----|------------------------------------------------------------------------------------------------------------------------------------------------------------------------------------------------------------------------------------------------------------------------------------------------------------------------------------------------------------------------------------------------------------------------------------------------------------------------------------------------------------------------------------------------------------------------------------------------------------------------------------------------------------------------------------------------------|-------------------------------------------------------------------------------------|
|    | 65 c -9.323066 -0.332816<br>1.020083<br>66 c -12.778461 0.787090 -<br>6.900986<br>67 c -9.569977 -0.043042 -<br>0.304626<br>68 c -12.028908 0.697209 -<br>5.789986<br>69 c -10.254116 0.200190 -<br>1.303590<br>70 c -11.457292 0.619645 -<br>4.660519<br>71 c -11.400538 0.371515 -<br>2.059381<br>72 c -11.890415 0.488785 -<br>3.367267                                                                                                                                                                                                                                                                                                                                                           |                                                                                     |
| 21 | <sup>52</sup> C <sub>36</sub> -sheet                                                                                                                                                                                                                                                                                                                                                                                                                                                                                                                                                                                                                                                                 |                                                                                     |
|    | 1 c -0.698665 0.000000 -<br>3.121878<br>2 c 0.698665 0.000000 -<br>3.121878<br>3 c -1.688698 0.000000 -<br>4.089939<br>4 c 1.688698 0.000000 -<br>4.089939<br>5 c -2.848464 0.000000 -<br>4.517581<br>6 c 2.848464 0.000000 -<br>4.517581<br>7 c -4.221104 0.000000 -<br>4.418998<br>8 c 4.221104 0.000000 -<br>4.418998<br>9 c -4.563099 0.000000 -<br>3.207836<br>10 c 4.563099 0.000000 -<br>3.207836<br>11 c -4.191843 0.000000 -<br>1.917505<br>12 c 4.191843 0.000000 -<br>1.917505<br>13 c -3.095871 0.000000 -<br>1.332320<br>14 c 3.095871 0.000000 -<br>1.332320<br>15 c -1.809077 0.000000 -<br>0.742060<br>16 c 1.809077 0.000000 -<br>0.742060<br>17 c -0.738111 0.000000 -<br>1.613297 | 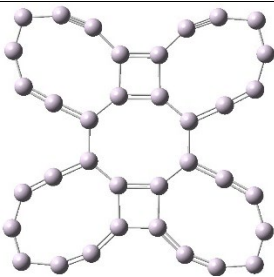 |

|    |                                         |           |          |   |  |
|----|-----------------------------------------|-----------|----------|---|--|
|    | 18 c                                    | 0.738111  | 0.000000 | - |  |
|    | 1.613297                                |           |          |   |  |
|    | 19 c                                    | -0.737666 | 0.000000 |   |  |
|    | 1.613024                                |           |          |   |  |
|    | 20 c                                    | 0.737666  | 0.000000 |   |  |
|    | 1.613024                                |           |          |   |  |
|    | 21 c                                    | -1.809138 | 0.000000 |   |  |
|    | 0.742496                                |           |          |   |  |
|    | 22 c                                    | 1.809138  | 0.000000 |   |  |
|    | 0.742496                                |           |          |   |  |
|    | 23 c                                    | -3.095668 | 0.000000 |   |  |
|    | 1.334244                                |           |          |   |  |
|    | 24 c                                    | 3.095668  | 0.000000 |   |  |
|    | 1.334244                                |           |          |   |  |
|    | 25 c                                    | -4.191289 | 0.000000 |   |  |
|    | 1.919272                                |           |          |   |  |
|    | 26 c                                    | 4.191289  | 0.000000 |   |  |
|    | 1.919272                                |           |          |   |  |
|    | 27 c                                    | -4.571977 | 0.000000 |   |  |
|    | 3.207647                                |           |          |   |  |
|    | 28 c                                    | 4.571977  | 0.000000 |   |  |
|    | 3.207647                                |           |          |   |  |
|    | 29 c                                    | -4.219102 | 0.000000 |   |  |
|    | 4.414525                                |           |          |   |  |
|    | 30 c                                    | 4.219102  | 0.000000 |   |  |
|    | 4.414525                                |           |          |   |  |
|    | 31 c                                    | -2.848069 | 0.000000 |   |  |
|    | 4.521681                                |           |          |   |  |
|    | 32 c                                    | 2.848069  | 0.000000 |   |  |
|    | 4.521681                                |           |          |   |  |
|    | 33 c                                    | -1.691040 | 0.000000 |   |  |
|    | 4.086763                                |           |          |   |  |
|    | 34 c                                    | 1.691040  | 0.000000 |   |  |
|    | 4.086763                                |           |          |   |  |
|    | 35 c                                    | -0.698620 | 0.000000 |   |  |
|    | 3.121763                                |           |          |   |  |
|    | 36 c                                    | 0.698620  | 0.000000 |   |  |
|    | 3.121763                                |           |          |   |  |
| 22 | S <sup>2</sup> C <sub>72</sub> -sheet-1 |           |          |   |  |



|          |           |           |   |                                                                                    |
|----------|-----------|-----------|---|------------------------------------------------------------------------------------|
| 1 c      | -0.789571 | -7.278273 | - | 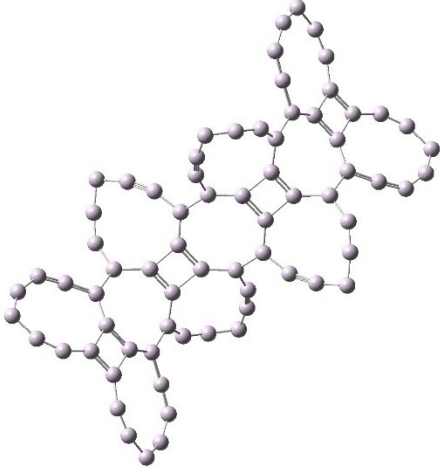 |
| 0.700502 |           |           |   |                                                                                    |
| 2 c      | -0.789571 | -7.278273 |   |                                                                                    |
| 0.700502 |           |           |   |                                                                                    |
| 3 c      | -1.187509 | -8.142904 | - |                                                                                    |
| 1.697499 |           |           |   |                                                                                    |
| 4 c      | -1.187509 | -8.142904 |   |                                                                                    |
| 1.697499 |           |           |   |                                                                                    |
| 5 c      | -1.159392 | -8.572190 | - |                                                                                    |
| 2.860910 |           |           |   |                                                                                    |
| 6 c      | -1.159392 | -8.572190 |   |                                                                                    |
| 2.860910 |           |           |   |                                                                                    |
| 7 c      | -0.810025 | -8.620851 | - |                                                                                    |
| 4.182634 |           |           |   |                                                                                    |
| 8 c      | -0.810025 | -8.620851 |   |                                                                                    |
| 4.182634 |           |           |   |                                                                                    |
| 9 c      | 0.007903  | -7.694400 | - |                                                                                    |
| 4.443219 |           |           |   |                                                                                    |
| 10 c     | 0.007903  | -7.694400 |   |                                                                                    |
| 4.443219 |           |           |   |                                                                                    |
| 11 c     | 0.663262  | -6.592300 | - |                                                                                    |
| 4.066475 |           |           |   |                                                                                    |
| 12 c     | 0.663262  | -6.592300 |   |                                                                                    |
| 4.066475 |           |           |   |                                                                                    |
| 13 c     | 0.779106  | -5.971576 | - |                                                                                    |
| 2.994035 |           |           |   |                                                                                    |
| 14 c     | 0.779106  | -5.971576 |   |                                                                                    |
| 2.994035 |           |           |   |                                                                                    |
| 15 c     | 0.763944  | -5.350157 | - |                                                                                    |
| 1.727669 |           |           |   |                                                                                    |
| 16 c     | 0.763944  | -5.350157 |   |                                                                                    |
| 1.727669 |           |           |   |                                                                                    |
| 17 c     | 0.050663  | -6.006154 | - |                                                                                    |
| 0.715452 |           |           |   |                                                                                    |
| 18 c     | 0.050663  | -6.006154 |   |                                                                                    |
| 0.715452 |           |           |   |                                                                                    |
| 19 c     | 1.142070  | -3.026655 | - |                                                                                    |
| 0.692007 |           |           |   |                                                                                    |
| 20 c     | 1.142070  | -3.026655 |   |                                                                                    |
| 0.692007 |           |           |   |                                                                                    |
| 21 c     | 1.460414  | -4.071339 | - |                                                                                    |
| 1.681525 |           |           |   |                                                                                    |
| 22 c     | 1.460414  | -4.071339 |   |                                                                                    |
| 1.681525 |           |           |   |                                                                                    |
| 23 c     | 2.298468  | -3.801806 | - |                                                                                    |
| 2.735089 |           |           |   |                                                                                    |
| 24 c     | 2.298468  | -3.801806 |   |                                                                                    |
| 2.735089 |           |           |   |                                                                                    |
| 25 c     | 2.716930  | -2.949376 | - |                                                                                    |
| 3.569282 |           |           |   |                                                                                    |

|          |           |           |   |
|----------|-----------|-----------|---|
| 26 c     | 2.716930  | -2.949376 |   |
| 3.569282 |           |           |   |
| 27 c     | 2.868227  | -1.914241 | - |
| 4.427576 |           |           |   |
| 28 c     | 2.868227  | -1.914241 |   |
| 4.427576 |           |           |   |
| 29 c     | 1.979866  | -1.155932 | - |
| 3.722752 |           |           |   |
| 30 c     | 1.979866  | -1.155932 |   |
| 3.722752 |           |           |   |
| 31 c     | 1.125485  | -0.722816 | - |
| 2.914832 |           |           |   |
| 32 c     | 1.125485  | -0.722816 |   |
| 2.914832 |           |           |   |
| 33 c     | 0.456068  | -0.597772 | - |
| 1.717344 |           |           |   |
| 34 c     | 0.456068  | -0.597772 |   |
| 1.717344 |           |           |   |
| 35 c     | 0.695872  | -1.564916 | - |
| 0.713977 |           |           |   |
| 36 c     | 0.695872  | -1.564916 |   |
| 0.713977 |           |           |   |
| 37 c     | -0.695872 | 1.564916  | - |
| 0.713977 |           |           |   |
| 38 c     | -0.695872 | 1.564916  |   |
| 0.713977 |           |           |   |
| 39 c     | -0.456068 | 0.597772  | - |
| 1.717344 |           |           |   |
| 40 c     | -0.456068 | 0.597772  |   |
| 1.717344 |           |           |   |
| 41 c     | -1.125485 | 0.722816  | - |
| 2.914832 |           |           |   |
| 42 c     | -1.125485 | 0.722816  |   |
| 2.914832 |           |           |   |
| 43 c     | -1.979866 | 1.155932  | - |
| 3.722752 |           |           |   |
| 44 c     | -1.979866 | 1.155932  |   |
| 3.722752 |           |           |   |
| 45 c     | -2.868227 | 1.914241  | - |
| 4.427576 |           |           |   |
| 46 c     | -2.868227 | 1.914241  |   |
| 4.427576 |           |           |   |
| 47 c     | -2.716930 | 2.949376  | - |
| 3.569282 |           |           |   |
| 48 c     | -2.716930 | 2.949376  |   |
| 3.569282 |           |           |   |
| 49 c     | -2.298468 | 3.801806  | - |
| 2.735089 |           |           |   |
| 50 c     | -2.298468 | 3.801806  |   |
| 2.735089 |           |           |   |

|    |               |           |          |   |  |
|----|---------------|-----------|----------|---|--|
|    | 51 c          | -1.460414 | 4.071339 | - |  |
|    | 1.681525      |           |          |   |  |
|    | 52 c          | -1.460414 | 4.071339 |   |  |
|    | 1.681525      |           |          |   |  |
|    | 53 c          | -1.142070 | 3.026655 | - |  |
|    | 0.692007      |           |          |   |  |
|    | 54 c          | -1.142070 | 3.026655 |   |  |
|    | 0.692007      |           |          |   |  |
|    | 55 c          | -0.050663 | 6.006154 | - |  |
|    | 0.715452      |           |          |   |  |
|    | 56 c          | -0.050663 | 6.006154 |   |  |
|    | 0.715452      |           |          |   |  |
|    | 57 c          | -0.763944 | 5.350157 | - |  |
|    | 1.727669      |           |          |   |  |
|    | 58 c          | -0.763944 | 5.350157 |   |  |
|    | 1.727669      |           |          |   |  |
|    | 59 c          | -0.779106 | 5.971576 | - |  |
|    | 2.994035      |           |          |   |  |
|    | 60 c          | -0.779106 | 5.971576 |   |  |
|    | 2.994035      |           |          |   |  |
|    | 61 c          | -0.663262 | 6.592300 | - |  |
|    | 4.066475      |           |          |   |  |
|    | 62 c          | -0.663262 | 6.592300 |   |  |
|    | 4.066475      |           |          |   |  |
|    | 63 c          | -0.007903 | 7.694400 | - |  |
|    | 4.443219      |           |          |   |  |
|    | 64 c          | -0.007903 | 7.694400 |   |  |
|    | 4.443219      |           |          |   |  |
|    | 65 c          | 0.810025  | 8.620851 | - |  |
|    | 4.182634      |           |          |   |  |
|    | 66 c          | 0.810025  | 8.620851 |   |  |
|    | 4.182634      |           |          |   |  |
|    | 67 c          | 1.159392  | 8.572190 | - |  |
|    | 2.860910      |           |          |   |  |
|    | 68 c          | 1.159392  | 8.572190 |   |  |
|    | 2.860910      |           |          |   |  |
|    | 69 c          | 1.187509  | 8.142904 | - |  |
|    | 1.697499      |           |          |   |  |
|    | 70 c          | 1.187509  | 8.142904 |   |  |
|    | 1.697499      |           |          |   |  |
|    | 71 c          | 0.789571  | 7.278273 | - |  |
|    | 0.700502      |           |          |   |  |
|    | 72 c          | 0.789571  | 7.278273 |   |  |
|    | 0.700502      |           |          |   |  |
| 23 | S2C72-sheet-2 |           |          |   |  |

|           |          |           |   |                                                                                    |
|-----------|----------|-----------|---|------------------------------------------------------------------------------------|
| 1 c       | 0.000000 | 0.699043  | - | 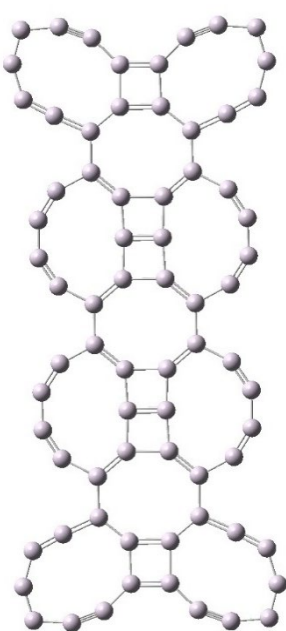 |
| 9.307554  |          |           |   |                                                                                    |
| 2 c       | 0.000000 | -0.699043 | - |                                                                                    |
| 9.307554  |          |           |   |                                                                                    |
| 3 c       | 0.000000 | 1.691876  | - |                                                                                    |
| 10.270052 |          |           |   |                                                                                    |
| 4 c       | 0.000000 | -1.691876 | - |                                                                                    |
| 10.270052 |          |           |   |                                                                                    |
| 5 c       | 0.000000 | 2.855395  | - |                                                                                    |
| 10.690361 |          |           |   |                                                                                    |
| 6 c       | 0.000000 | -2.855395 | - |                                                                                    |
| 10.690361 |          |           |   |                                                                                    |
| 7 c       | 0.000000 | 4.226113  | - |                                                                                    |
| 10.588368 |          |           |   |                                                                                    |
| 8 c       | 0.000000 | -4.226113 | - |                                                                                    |
| 10.588368 |          |           |   |                                                                                    |
| 9 c       | 0.000000 | 4.565644  | - |                                                                                    |
| 9.375673  |          |           |   |                                                                                    |
| 10 c      | 0.000000 | -4.565644 | - |                                                                                    |
| 9.375673  |          |           |   |                                                                                    |
| 11 c      | 0.000000 | 4.199870  | - |                                                                                    |
| 8.084859  |          |           |   |                                                                                    |
| 12 c      | 0.000000 | -4.199870 | - |                                                                                    |
| 8.084859  |          |           |   |                                                                                    |
| 13 c      | 0.000000 | 3.102829  | - |                                                                                    |
| 7.500846  |          |           |   |                                                                                    |
| 14 c      | 0.000000 | -3.102829 | - |                                                                                    |
| 7.500846  |          |           |   |                                                                                    |
| 15 c      | 0.000000 | 1.811078  | - |                                                                                    |
| 6.921272  |          |           |   |                                                                                    |
| 16 c      | 0.000000 | -1.811078 | - |                                                                                    |
| 6.921272  |          |           |   |                                                                                    |
| 17 c      | 0.000000 | 0.735146  | - |                                                                                    |
| 7.795569  |          |           |   |                                                                                    |
| 18 c      | 0.000000 | -0.735146 | - |                                                                                    |
| 7.795569  |          |           |   |                                                                                    |
| 19 c      | 0.000000 | 0.765721  | - |                                                                                    |
| 4.566337  |          |           |   |                                                                                    |
| 20 c      | 0.000000 | -0.765721 | - |                                                                                    |
| 4.566337  |          |           |   |                                                                                    |
| 21 c      | 0.000000 | 1.824254  | - |                                                                                    |
| 5.451486  |          |           |   |                                                                                    |
| 22 c      | 0.000000 | -1.824254 | - |                                                                                    |
| 5.451486  |          |           |   |                                                                                    |
| 23 c      | 0.000000 | 3.086152  | - |                                                                                    |
| 4.795464  |          |           |   |                                                                                    |
| 24 c      | 0.000000 | -3.086152 | - |                                                                                    |
| 4.795464  |          |           |   |                                                                                    |
| 25 c      | 0.000000 | 3.752176  | - |                                                                                    |
| 3.764366  |          |           |   |                                                                                    |

|          |          |           |   |
|----------|----------|-----------|---|
| 26 c     | 0.000000 | -3.752176 | - |
| 3.764366 |          |           |   |
| 27 c     | 0.000000 | 3.766979  | - |
| 2.407400 |          |           |   |
| 28 c     | 0.000000 | -3.766979 | - |
| 2.407400 |          |           |   |
| 29 c     | 0.000000 | 3.083852  | - |
| 1.387581 |          |           |   |
| 30 c     | 0.000000 | -3.083852 | - |
| 1.387581 |          |           |   |
| 31 c     | 0.000000 | 1.823939  | - |
| 0.729571 |          |           |   |
| 32 c     | 0.000000 | -1.823939 | - |
| 0.729571 |          |           |   |
| 33 c     | 0.000000 | 0.761685  | - |
| 1.615734 |          |           |   |
| 34 c     | 0.000000 | -0.761685 | - |
| 1.615734 |          |           |   |
| 35 c     | 0.000000 | 0.690517  | - |
| 3.094694 |          |           |   |
| 36 c     | 0.000000 | -0.690517 | - |
| 3.094694 |          |           |   |
| 37 c     | 0.000000 | 0.690517  |   |
| 3.094694 |          |           |   |
| 38 c     | 0.000000 | -0.690517 |   |
| 3.094694 |          |           |   |
| 39 c     | 0.000000 | 0.761685  |   |
| 1.615734 |          |           |   |
| 40 c     | 0.000000 | -0.761685 |   |
| 1.615734 |          |           |   |
| 41 c     | 0.000000 | 1.823939  |   |
| 0.729571 |          |           |   |
| 42 c     | 0.000000 | -1.823939 |   |
| 0.729571 |          |           |   |
| 43 c     | 0.000000 | 3.083852  |   |
| 1.387581 |          |           |   |
| 44 c     | 0.000000 | -3.083852 |   |
| 1.387581 |          |           |   |
| 45 c     | 0.000000 | 3.766979  |   |
| 2.407400 |          |           |   |
| 46 c     | 0.000000 | -3.766979 |   |
| 2.407400 |          |           |   |
| 47 c     | 0.000000 | 3.752176  |   |
| 3.764366 |          |           |   |
| 48 c     | 0.000000 | -3.752176 |   |
| 3.764366 |          |           |   |
| 49 c     | 0.000000 | 3.086152  |   |
| 4.795464 |          |           |   |
| 50 c     | 0.000000 | -3.086152 |   |
| 4.795464 |          |           |   |

|    |            |          |           |  |
|----|------------|----------|-----------|--|
|    | 51 c       | 0.000000 | 1.824254  |  |
|    | 5.451486   |          |           |  |
|    | 52 c       | 0.000000 | -1.824254 |  |
|    | 5.451486   |          |           |  |
|    | 53 c       | 0.000000 | 0.765721  |  |
|    | 4.566337   |          |           |  |
|    | 54 c       | 0.000000 | -0.765721 |  |
|    | 4.566337   |          |           |  |
|    | 55 c       | 0.000000 | 0.735146  |  |
|    | 7.795569   |          |           |  |
|    | 56 c       | 0.000000 | -0.735146 |  |
|    | 7.795569   |          |           |  |
|    | 57 c       | 0.000000 | 1.811078  |  |
|    | 6.921272   |          |           |  |
|    | 58 c       | 0.000000 | -1.811078 |  |
|    | 6.921272   |          |           |  |
|    | 59 c       | 0.000000 | 3.102829  |  |
|    | 7.500846   |          |           |  |
|    | 60 c       | 0.000000 | -3.102829 |  |
|    | 7.500846   |          |           |  |
|    | 61 c       | 0.000000 | 4.199870  |  |
|    | 8.084859   |          |           |  |
|    | 62 c       | 0.000000 | -4.199870 |  |
|    | 8.084859   |          |           |  |
|    | 63 c       | 0.000000 | 4.565644  |  |
|    | 9.375673   |          |           |  |
|    | 64 c       | 0.000000 | -4.565644 |  |
|    | 9.375673   |          |           |  |
|    | 65 c       | 0.000000 | 4.226113  |  |
|    | 10.588368  |          |           |  |
|    | 66 c       | 0.000000 | -4.226113 |  |
|    | 10.588368  |          |           |  |
|    | 67 c       | 0.000000 | 2.855395  |  |
|    | 10.690361  |          |           |  |
|    | 68 c       | 0.000000 | -2.855395 |  |
|    | 10.690361  |          |           |  |
|    | 69 c       | 0.000000 | 1.691876  |  |
|    | 10.270052  |          |           |  |
|    | 70 c       | 0.000000 | -1.691876 |  |
|    | 10.270052  |          |           |  |
|    | 71 c       | 0.000000 | 0.699043  |  |
|    | 9.307554   |          |           |  |
|    | 72 c       | 0.000000 | -0.699043 |  |
|    | 9.307554   |          |           |  |
| 24 | S2C72-tube |          |           |  |

|  |          |           |           |                                                                                    |
|--|----------|-----------|-----------|------------------------------------------------------------------------------------|
|  | 1 c      | -2.192093 | -0.752114 | 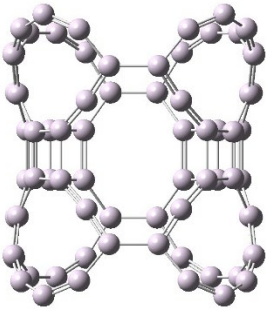 |
|  | 2.800452 |           |           |                                                                                    |
|  | 2 c      | -2.192093 | 0.752114  |                                                                                    |
|  | 2.800452 |           |           |                                                                                    |
|  | 3 c      | -1.419152 | -1.634716 |                                                                                    |
|  | 3.393807 |           |           |                                                                                    |
|  | 4 c      | -1.419152 | 1.634716  |                                                                                    |
|  | 3.393807 |           |           |                                                                                    |
|  | 5 c      | -0.744036 | -2.678449 |                                                                                    |
|  | 3.896671 |           |           |                                                                                    |
|  | 6 c      | -0.744036 | 2.678449  |                                                                                    |
|  | 3.896671 |           |           |                                                                                    |
|  | 7 c      | -1.641784 | -3.777176 |                                                                                    |
|  | 4.039003 |           |           |                                                                                    |
|  | 8 c      | -1.641784 | 3.777176  |                                                                                    |
|  | 4.039003 |           |           |                                                                                    |
|  | 9 c      | -2.710620 | -4.227369 |                                                                                    |
|  | 3.583855 |           |           |                                                                                    |
|  | 10 c     | -2.710620 | 4.227369  |                                                                                    |
|  | 3.583855 |           |           |                                                                                    |
|  | 11 c     | -3.378127 | -3.795978 |                                                                                    |
|  | 2.468001 |           |           |                                                                                    |
|  | 12 c     | -3.378127 | 3.795978  |                                                                                    |
|  | 2.468001 |           |           |                                                                                    |
|  | 13 c     | -3.612178 | -3.016567 |                                                                                    |
|  | 1.543712 |           |           |                                                                                    |
|  | 14 c     | -3.612178 | 3.016567  |                                                                                    |
|  | 1.543712 |           |           |                                                                                    |
|  | 15 c     | -3.484324 | -1.836943 |                                                                                    |
|  | 0.762764 |           |           |                                                                                    |
|  | 16 c     | -3.484324 | 1.836943  |                                                                                    |
|  | 0.762764 |           |           |                                                                                    |
|  | 17 c     | -2.983557 | -0.697726 |                                                                                    |
|  | 1.521323 |           |           |                                                                                    |
|  | 18 c     | -2.983557 | 0.697726  |                                                                                    |
|  | 1.521323 |           |           |                                                                                    |
|  | 19 c     | -3.200611 | -0.752130 | -                                                                                  |
|  | 1.505166 |           |           |                                                                                    |
|  | 20 c     | -3.200611 | 0.752130  | -                                                                                  |
|  | 1.505166 |           |           |                                                                                    |
|  | 21 c     | -3.542117 | -1.867303 | -                                                                                  |
|  | 0.628290 |           |           |                                                                                    |
|  | 22 c     | -3.542117 | 1.867303  | -                                                                                  |
|  | 0.628290 |           |           |                                                                                    |
|  | 23 c     | -3.595504 | -3.077547 | -                                                                                  |
|  | 1.372128 |           |           |                                                                                    |
|  | 24 c     | -3.595504 | 3.077547  | -                                                                                  |
|  | 1.372128 |           |           |                                                                                    |
|  | 25 c     | -3.157638 | -3.667925 | -                                                                                  |
|  | 2.362640 |           |           |                                                                                    |

|          |           |           |   |
|----------|-----------|-----------|---|
| 26 c     | -3.157638 | 3.667925  | - |
| 2.362640 |           |           |   |
| 27 c     | -2.324400 | -3.669098 | - |
| 3.433686 |           |           |   |
| 28 c     | -2.324400 | 3.669098  | - |
| 3.433686 |           |           |   |
| 29 c     | -1.440868 | -3.085296 | - |
| 4.066647 |           |           |   |
| 30 c     | -1.440868 | 3.085296  | - |
| 4.066647 |           |           |   |
| 31 c     | -0.696079 | -1.880658 | - |
| 4.183005 |           |           |   |
| 32 c     | -0.696079 | 1.880658  | - |
| 4.183005 |           |           |   |
| 33 c     | -1.498080 | -0.743473 | - |
| 3.725041 |           |           |   |
| 34 c     | -1.498080 | 0.743473  | - |
| 3.725041 |           |           |   |
| 35 c     | -2.513200 | -0.741736 | - |
| 2.732984 |           |           |   |
| 36 c     | -2.513200 | 0.741736  | - |
| 2.732984 |           |           |   |
| 37 c     | 2.513200  | -0.741736 | - |
| 2.732984 |           |           |   |
| 38 c     | 2.513200  | 0.741736  | - |
| 2.732984 |           |           |   |
| 39 c     | 1.498080  | -0.743473 | - |
| 3.725041 |           |           |   |
| 40 c     | 1.498080  | 0.743473  | - |
| 3.725041 |           |           |   |
| 41 c     | 0.696079  | -1.880658 | - |
| 4.183005 |           |           |   |
| 42 c     | 0.696079  | 1.880658  | - |
| 4.183005 |           |           |   |
| 43 c     | 1.440868  | -3.085296 | - |
| 4.066647 |           |           |   |
| 44 c     | 1.440868  | 3.085296  | - |
| 4.066647 |           |           |   |
| 45 c     | 2.324400  | -3.669098 | - |
| 3.433686 |           |           |   |
| 46 c     | 2.324400  | 3.669098  | - |
| 3.433686 |           |           |   |
| 47 c     | 3.157638  | -3.667925 | - |
| 2.362640 |           |           |   |
| 48 c     | 3.157638  | 3.667925  | - |
| 2.362640 |           |           |   |
| 49 c     | 3.595504  | -3.077547 | - |
| 1.372128 |           |           |   |
| 50 c     | 3.595504  | 3.077547  | - |
| 1.372128 |           |           |   |



|          |          |           |   |
|----------|----------|-----------|---|
| 51 c     | 3.542117 | -1.867303 | - |
| 0.628290 |          |           |   |
| 52 c     | 3.542117 | 1.867303  | - |
| 0.628290 |          |           |   |
| 53 c     | 3.200611 | -0.752130 | - |
| 1.505166 |          |           |   |
| 54 c     | 3.200611 | 0.752130  | - |
| 1.505166 |          |           |   |
| 55 c     | 2.983557 | -0.697726 |   |
| 1.521323 |          |           |   |
| 56 c     | 2.983557 | 0.697726  |   |
| 1.521323 |          |           |   |
| 57 c     | 3.484324 | -1.836943 |   |
| 0.762764 |          |           |   |
| 58 c     | 3.484324 | 1.836943  |   |
| 0.762764 |          |           |   |
| 59 c     | 3.612178 | -3.016567 |   |
| 1.543712 |          |           |   |
| 60 c     | 3.612178 | 3.016567  |   |
| 1.543712 |          |           |   |
| 61 c     | 3.378127 | -3.795978 |   |
| 2.468001 |          |           |   |
| 62 c     | 3.378127 | 3.795978  |   |
| 2.468001 |          |           |   |
| 63 c     | 2.710620 | -4.227369 |   |
| 3.583855 |          |           |   |
| 64 c     | 2.710620 | 4.227369  |   |
| 3.583855 |          |           |   |
| 65 c     | 1.641784 | -3.777176 |   |
| 4.039003 |          |           |   |
| 66 c     | 1.641784 | 3.777176  |   |
| 4.039003 |          |           |   |
| 67 c     | 0.744036 | -2.678449 |   |
| 3.896671 |          |           |   |
| 68 c     | 0.744036 | 2.678449  |   |
| 3.896671 |          |           |   |
| 69 c     | 1.419152 | -1.634716 |   |
| 3.393807 |          |           |   |
| 70 c     | 1.419152 | 1.634716  |   |
| 3.393807 |          |           |   |
| 71 c     | 2.192093 | -0.752114 |   |
| 2.800452 |          |           |   |
| 72 c     | 2.192093 | 0.752114  |   |
| 2.800452 |          |           |   |

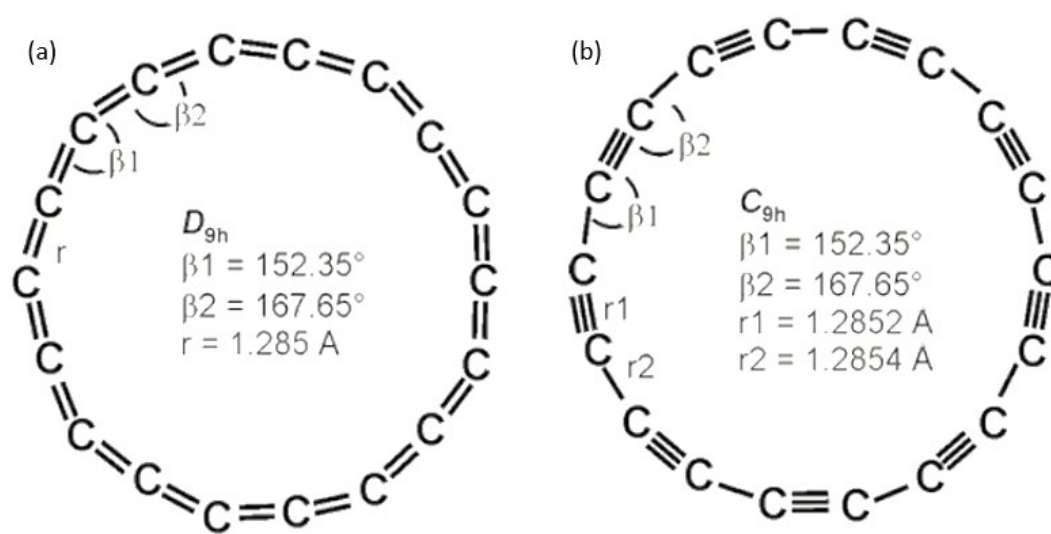

**Figure S1.** Quantum chemistry calculated<sup>a</sup> structures for cyclo[18]carbon; (a) cumulenic; (b) polyynic.

#### <sup>a</sup> Gas-phase electronic spectra of C 18 and C 22 rings

Boguslavskiy, A.E.; Ding, H.; Maier, J.P. Gas-phase electronic spectra of C18 and C22 rings. *J. Chem. Phys.* **2005**, *123*, 034305. <https://doi.org/10.1063/1.1961564>
